# Supplementary material for: Controlled and sequential single-electron reduction of the uranyl dication
Source: Royal Society of Chemistry journal article supplement (doi:10.1039/d4dt02367f), 2024-01-01
Supplement: d4dt02367f1.pdf [file d4dt02367f1.pdf]

## Controlled and sequential single-electron reduction of the uranyl dication

Tom J. N. Obey, Gary S. Nichol, Jason B. Love\*

EaStCHEM School of Chemistry, Joseph Black Building, University of Edinburgh, Edinburgh EH9 3FJ, UK

### Contents

|                                                                                              |    |
|----------------------------------------------------------------------------------------------|----|
| General Details.....                                                                         | 2  |
| Abbreviations.....                                                                           | 3  |
| Synthesis .....                                                                              | 3  |
| H <sub>3</sub> L .....                                                                       | 3  |
| [UO <sub>2</sub> (HL)] <sub>2</sub> , 1.....                                                 | 5  |
| UO <sub>2</sub> (LiL)(py) <sub>3</sub> , 3.....                                              | 7  |
| U <sup>VI</sup> O <sub>2</sub> (KNaL)(N(SiMe <sub>3</sub> ) <sub>2</sub> ), 4-Na/K.....      | 10 |
| [U <sup>V</sup> O <sub>2</sub> (K <sub>2</sub> L)(py) <sub>4</sub> ] <sub>2</sub> , 5-K..... | 13 |
| [U <sup>V</sup> O <sub>2</sub> Zn(L)(py) <sub>2</sub> ] <sub>2</sub> , 6-Zn.....             | 14 |
| [U <sup>V</sup> O <sub>2</sub> Y(Cl)(L)(py) <sub>2</sub> ] <sub>2</sub> , 6-Y.....           | 15 |
| [U <sup>V</sup> O <sub>2</sub> Dy(Cl)(L)(py) <sub>2</sub> ] <sub>2</sub> , 6-Dy.....         | 16 |
| [U <sup>V</sup> O <sub>2</sub> Sm(Cl)(L)(py) <sub>2</sub> ] <sub>2</sub> , 6-Sm.....         | 16 |
| [U <sup>V</sup> O <sub>2</sub> Y(Cl)(LiCl) <sub>2</sub> (L)(py) <sub>6</sub> ], 6-Y'.....    | 17 |
| [U <sup>V</sup> O <sub>2</sub> Dy(Cl)(LiCl) <sub>2</sub> (L)(py) <sub>6</sub> ], 6-Dy'.....  | 18 |
| [U <sup>IV</sup> O <sub>2</sub> Y(L)] <sub>2</sub> (THF) <sub>2</sub> , 7-THF.....           | 18 |
| Infrared Spectroscopy.....                                                                   | 20 |
| Electrochemistry.....                                                                        | 22 |
| Crystallographic details.....                                                                | 25 |
| References .....                                                                             | 39 |

## General Details

*Caution:* Depleted uranium (primary isotope  $^{238}\text{U}$ ) is a weak  $\alpha$ -emitter (4.197 MeV) with a half-life of  $4.47 \times 10^9$  years. All manipulations and reactions were carried out in monitored fumehoods or a glovebox with an inert atmosphere of dry dinitrogen in a lab equipped with  $\alpha$ - and  $\beta$ -counting equipment.

The synthesis of all air- and moisture-sensitive compounds was done either on a Schlenk line using standard Schlenk technique under an atmosphere of dry argon or in MBraun gloveboxes under an atmosphere of dry dinitrogen. Vacuum atmospheres and MBraun gloveboxes were used to store and handle the air- and moisture-sensitive compounds. Solvents pyridine- $d_5$  and benzene- $d_6$  were refluxed over potassium metal overnight, freeze-pump-thaw degassed three times and distilled under reduced pressure prior to use. All glassware and cannulae were stored in a  $160^\circ\text{C}$  oven overnight before use. Dry solvents were collected from a solvent purification system (Innovation Technologies) and stored in Teflon-tapped ampules over pre-dried  $4 \text{ \AA}$  molecular sieves. Tetrabutylammonium hexafluorophosphate,  $[\text{nBu}_4\text{N}][\text{PF}_6]$ , was recrystallised twice from ethanol and dried under reduced pressure before use. All other chemicals were used as received without further purification unless specified.  $^1\text{H}$  NMR and  $^{13}\text{C}\{^1\text{H}\}$  NMR were recorded on a Bruker AVA400 spectrometer at 399.90 MHz, Bruker AVA500 spectrometer at 500.12 MHz or Bruker AVA600 spectrometer at 599.81 MHz.  $^{29}\text{Si}\{^1\text{H}\}$  NMR was recorded on a Bruker PRO500 spectrometer at 470.59 MHz. All chemical shifts are reported in parts per million (ppm).  $^1\text{H}$  NMR and  $^{13}\text{C}\{^1\text{H}\}$  NMR were referenced to residual solvent signals, calibrated against  $\text{SiMe}_4$  ( $\delta = 0$  ppm). Spectra were recorded at 298 K. Data was processed using MestReNova 14.0.0. Single-crystal X-ray diffraction data were collected on an Oxford Diffraction Excalibur diffractometer using graphite monochromated  $\text{Mo K}\alpha$  radiation equipped with an Eos charge-coupled device detector ( $\lambda = 0.71073 \text{ \AA}$ ) at 120 K, or on a Supernova, Dual, Cu at zero Atlas diffractometer using  $\text{Cu K}\alpha$  radiation ( $\lambda = 1.5418 \text{ \AA}$ ) at 120 K. All structures were solved using ShelXT direct methods and refined using a full-matrix least-squares refinement on  $|F|^2$  using ShelXL.<sup>1, 2</sup> All programs were used within the Olex2 suite.<sup>3</sup> Non-hydrogen atoms were refined with anisotropic displacement parameters and hydrogen atoms were constrained to parent atoms and refined using a riding model. Structures were analysed and illustrated in Mercury 4.3.1.<sup>4</sup> The x-ray crystal structures of 2-THF, 2-py, 4-Na and 7-py were solved as two-component twins. Mass spectrometry was recorded using a 12T Bruker Solarix with APPI source with a portable glovebox flushed with argon surrounding the injection port. All FT-IR spectra were recorded using a Shimadzu IRSpirit Fourier Transform Infrared Spectrophotometer (serial no. A224157). Relevant peaks are reported in  $\text{cm}^{-1}$ . Cyclic voltammetry measurements were made using an Autolab 302 potentiostat and data processed in NOVA 2.1.5. All experiments were carried out at room temperature in a glovebox under a dinitrogen atmosphere. A

glassy-carbon working electrode, platinum counter electrode and silver wire pseudo-reference electrode were used with a 0.1 M solution of either  $[\text{nBu}_4\text{N}][\text{BPh}_4]$ ,  $[\text{nBu}_4\text{N}][\text{BAR}^{\text{F}}]$  or  $[\text{nBu}_4\text{N}][\text{PF}_6]$  in THF. All experiments were referenced against  $[\text{FeCp}_2]^{+/\text{0}}$  ( $E_{1/2}$ ,  $[\text{FeCp}_2]^{+/\text{0}} = 0.0\text{V}$ ). Elemental analysis was carried out by the London Metropolitan University and measured in duplicate.

### Abbreviations

THF = tetrahydrofuran

Py = pyridine

S = solvent

HMDS = hexamethyldisilazane

$\text{C}_6\text{D}_6 = d_6\text{-benzene}$

Cy-CH = cyclohexyl-CH

Im-CH = imino-CH

Py-CH = pyrrol-CH

### Synthesis

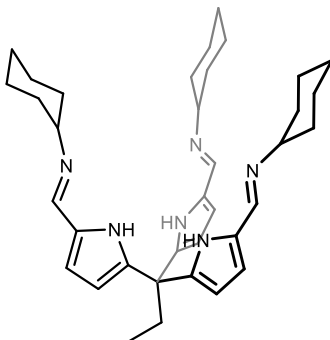

**H<sub>3</sub>L**:  $\text{H}_3\text{L}(\text{H}_2\text{O})_x$  was synthesised following literature procedures.<sup>5</sup> This was dried by dissolving 9.57 g, (0.017 mol, assuming  $x = 1$ ) in dry toluene under an argon atmosphere and trimethylsilyl chloride (7 mL, 0.055 mol) was added. A pale brown precipitate formed immediately. This solid was washed with dry toluene (3 x 30 mL) and suspended in toluene. A solution of 1,4-Diazabicyclo[2.2.2]octane (DABCO) (1.89 g, 0.017 mol) in dry toluene was added to the suspension and the mixture stirred for 16 hours. The mixture was filtered under argon and the solvent removed from the filtrate under reduced pressure to afford a pale brown solid. This solid was washed with acetonitrile to give the pure product as a colourless solid (4.78 g, 8.43 mmol, 50 %).  $^1\text{H}$  NMR (500 MHz, pyridine- $d_5$ ):  $\delta_{\text{H}}$  10.59 (br. s, 3H, NH), 8.05 (s, 3H, CH imine), 6.52 (d,  $J = 3.6$  Hz, 3H, CH pyrrole), 6.26 (d,  $J = 3.6$  Hz, 3H, CH pyrrole), 2.99 (m, 3H, cy), 2.69 (q,  $J = 7.4, 6.9$  Hz, 2H,  $\text{CH}_2$  ethyl) 1.68 – 1.62 (m, 12H, cy), 1.55 – 1.49 (m, 3H, cy), 1.42

(m, 6H, cy), 1.29 – 1.18 (m, 6H, cy), 1.09 (m, 3H, cy), 0.99 – 0.91 (t, 3H, CH<sub>3</sub> ethyl). <sup>13</sup>C{<sup>1</sup>H} NMR (126 MHz, Pyr): δ<sub>c</sub> 149.74 (imine CH), 140.04 (pyrrole C), 131.80 (pyrrole C), 114.09 (pyrrole CH), 109.65 (pyrrole CH), 69.69 (cy CH), 48.30 (cy CH<sub>2</sub>), 47.23 (Et C), 35.37 (cy CH<sub>2</sub>), 33.14 (Et CH<sub>2</sub>), 26.35 (cy CH<sub>2</sub>), 25.35 (cy CH<sub>2</sub>), 10.55 (Et CH<sub>3</sub>). APPI-MS: [H<sub>3</sub>L](H<sup>+</sup>) 567.41764 m/z.

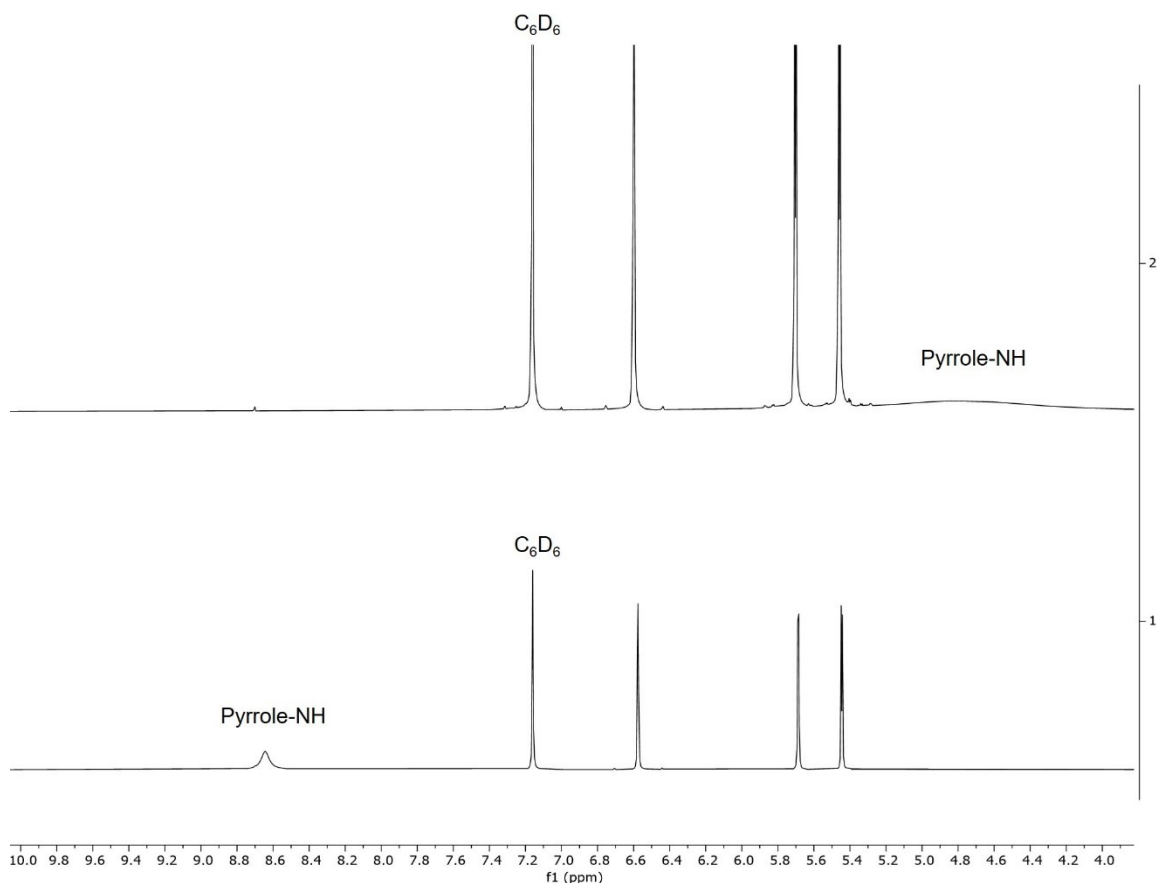

**Figure SI 1.** <sup>1</sup>H NMR spectra of **H<sub>3</sub>L·H<sub>2</sub>O** (TOP) and “dry” **H<sub>3</sub>L** (BOTTOM) in *d*<sub>6</sub>-benzene (7.16 ppm) in the range 10.0 – 4.0 ppm in *d*<sub>6</sub>-benzene. The NH peak in **H<sub>3</sub>L·H<sub>2</sub>O** (4.79 ppm) is much broader and shifted upfield compared to the NH peak in **H<sub>3</sub>L** (8.64 ppm). There is no shifting in the imine-CH (6.58 ppm) or pyrrole-CH (5.69 ppm, 5.45 ppm).

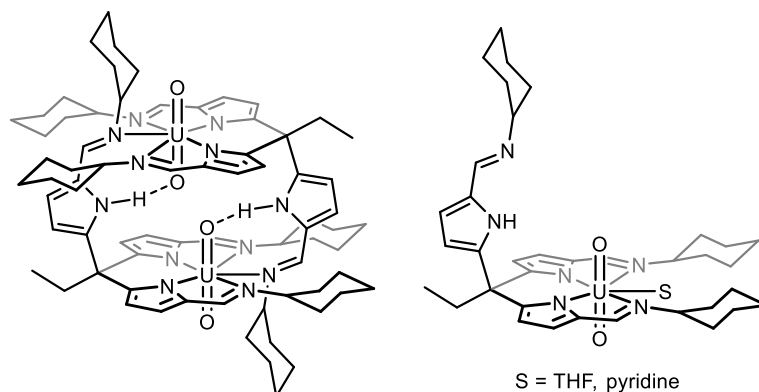

**[UO<sub>2</sub>(HL)]<sub>2</sub>, 1**: A solution of UO<sub>2</sub>(N(SiMe<sub>3</sub>)<sub>2</sub>)<sub>2</sub>(THF)<sub>2</sub> (1.50 g, 2.04 mmol) in dry toluene (20 mL) was added to a stirred solution of H<sub>3</sub>L (1.15 g, 2.03 mmol) in dry toluene (50 mL). The mixture immediately became dark brown and was stirred for 6 hours, after which a dark brown precipitate forms. The mixture was filtered and the precipitate isolated and washed with cold toluene and hexane to afford **1** as a brown solid (1.16 g, 0.695 mmol, 68%). X-ray quality crystals of **1** were obtained by precipitation from toluene at -20°C over several weeks. When dissolved in pyridine or THF, **1** is converted to the monomer [UO<sub>2</sub>(HL)(py)] (**2-py**) or [UO<sub>2</sub>(HL)(THF)] (**2-THF**) respectively, of which X-ray quality crystals were isolated by vapour diffusion of hexane into either a pyridine or THF solution. <sup>1</sup>H NMR (500 MHz, pyridine-*d*<sub>5</sub>): δ<sub>H</sub> 11.23 (s, 1H, py NH), 9.46 (s, 2H, CH imine), 8.21 (s, 1H, CH imine), 7.16 (d, *J* = 3.5 Hz, 2H, CH pyrrole), 6.83 (d, *J* = 3.5 Hz, 1H, CH pyrrole), 6.70 (d, *J* = 3.5 Hz, 1H, CH pyrrole), 6.56 (d, *J* = 3.5 Hz, 2H, CH pyrrole), 3.27 (m, 2H, cy), 3.02 (q, *J* = 7.3 Hz, 2H, et), 2.06 (d, *J* = 12.6 Hz, 2H, cy), 1.95 (d, *J* = 12.5 Hz, 2H, cy), 1.70 – 1.59 (m, 13H, cy), 1.52 – 1.38 (m, 13H, cy), 1.12 (t, *J* = 7.5 Hz, 3H, cy). <sup>13</sup>C{<sup>1</sup>H} NMR (126 MHz, pyridine-*d*<sub>5</sub>): δ<sub>C</sub> 160.07 (imine CH), 159.20 (pyrrole C), 150.69 (pyrrole C), 144.03 (pyrrole C), 138.59 (pyrrole C), 131.41 (pyrrole C), 121.58 (pyrrole CH), 113.83 (pyrrole CH), 113.08 (pyrrole CH), 108.80 (pyrrole CH), 70.06 (cy CH), 64.50 (cy CH), 52.30 (Et C), 38.82 (Et CH<sub>2</sub>), 35.54 (cy CH<sub>2</sub>), 35.40 (cy CH<sub>2</sub>), 34.54 (cy CH<sub>2</sub>), 27.04 (cy CH<sub>2</sub>), 26.96 (cy CH<sub>2</sub>), 26.48 (cy CH<sub>2</sub>), 26.26 (cy CH<sub>2</sub>), 25.44 (cy CH<sub>2</sub>), 11.34 (Et CH<sub>3</sub>). APPI-MS: [UO<sub>2</sub>(HL)](H<sup>+</sup>) 835.44532 m/z. IR: **1**; pyrrole N-H 3283.59 cm<sup>-1</sup>, imine C=N 1604.01 cm<sup>-1</sup>, pyrrole C-N 1047.96 cm<sup>-1</sup>, asymmetric O-U-O stretch 909.65 cm<sup>-1</sup>. EA: **2-THF**; Expected: C, 52.97; H, 6.22; N, 9.27; %. Found: C, 52.88; H, 6.26; N, 9.25; %.

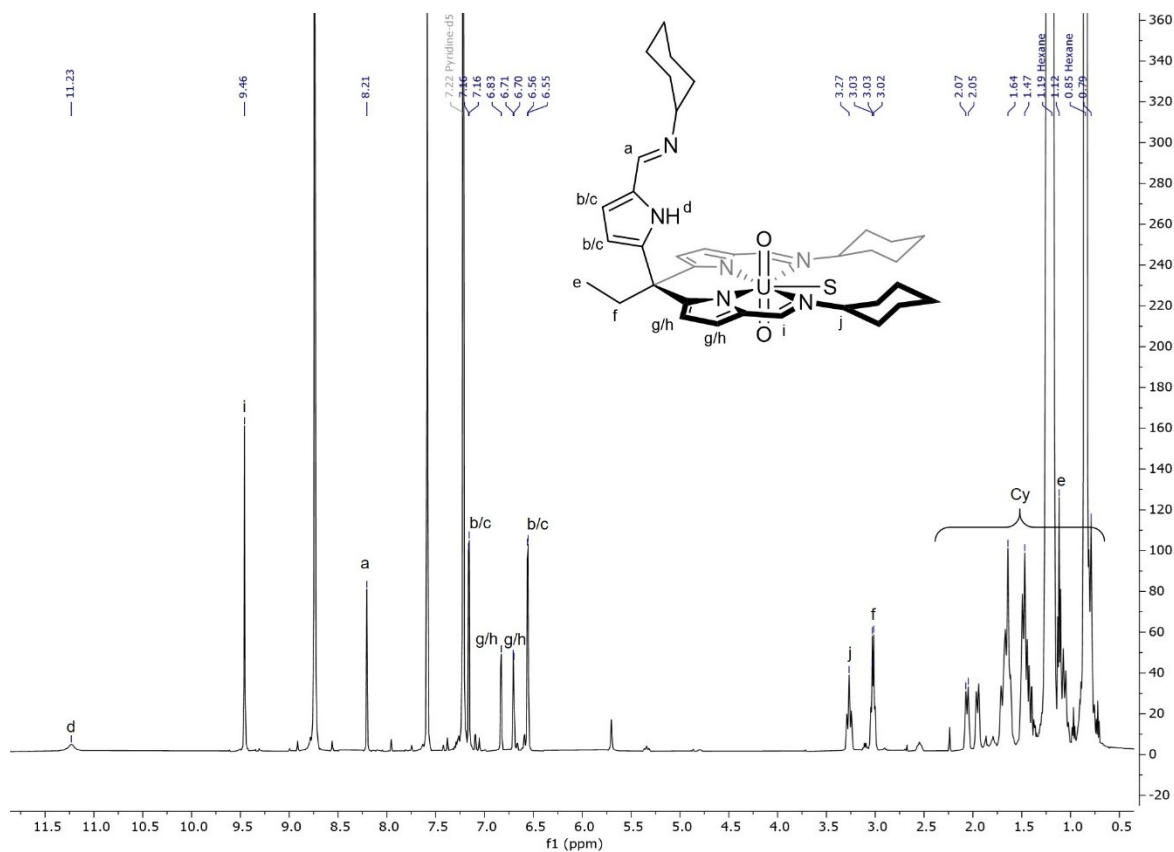

Figure SI 2.  $^1\text{H}$  NMR spectrum of **2-py** in  $d_5$ -pyridine.

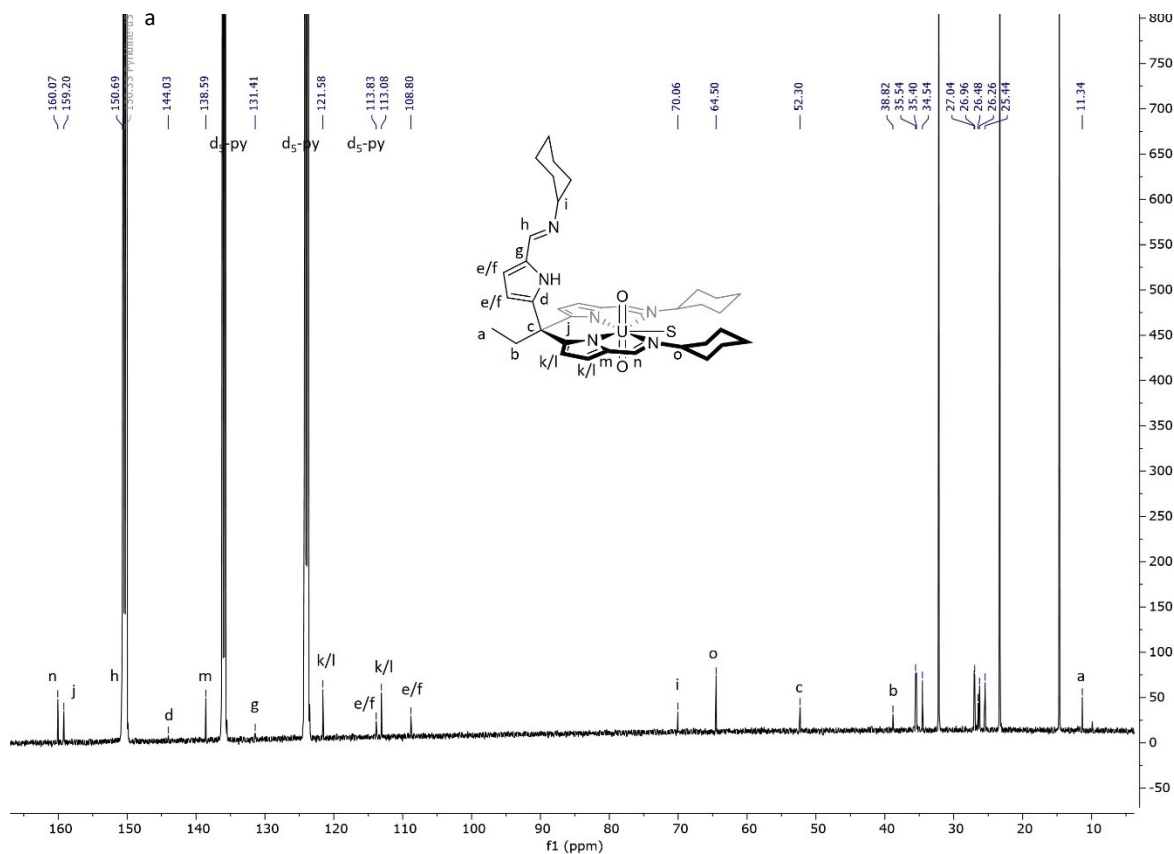

Figure SI 3.  $^{13}\text{C}\{^1\text{H}\}$  NMR spectrum of **2-py** in  $d_5$ -pyridine.

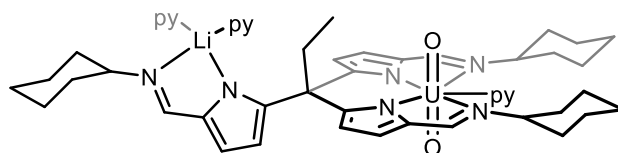

**$UO_2(LiL)(py)_3$ , 3**: A solution of  $LiN(SiMe_3)_2$  (0.09 g, 0.54 mmol, 2 eq.) in dry pyridine (5 mL) was added to a solution of **1** (0.45 g, 0.27 mmol) in pyridine (20 mL) under a nitrogen atmosphere. The resulting dark brown solution was stirred at room temperature for 30 minutes. The solution was concentrated under vacuum and layered with hexane to obtain the product as dark brown, X-ray quality crystals of **3** (0.32 g, 0.30 mmol, 56 %) after several days.  $^1H$  NMR (500 MHz, pyridine- $d_5$ ):  $\delta_H$  9.37 (s, 2H, imine CH), 8.29 (s, 1H, imine CH), 7.05 (d,  $J = 3.1$  Hz, 1H, pyrrole CH), 6.95 (d,  $J = 3.1$  Hz, 1H, pyrrole CH), 6.87 (d,  $J = 3.4$  Hz, 2H, pyrrole CH), 6.66 (d,  $J = 3.4$  Hz, 2H, pyrrole CH), 5.43 – 5.32 (m, 2H, cy), 3.71 – 3.63 (m, 1H, cy), 3.21 (q,  $J = 7.1$  Hz, 2H, ethyl  $CH_3$ ), 2.62 – 2.51 (m, 4H, cy), 1.90 – 1.85 (m, 3H, cy), 1.81 – 1.75 (m, 3H, cy), 1.72 – 1.64 (m, 4H, cy), 1.59 – 1.42 (m, 4H, cy), 1.44 (s, 1H, cy), 1.27 – 1.15 (m, 8H, cy), 1.22 – 1.18 (m, 3H, cy), 1.08 (t,  $J = 14.5$  Hz, 3H, ethyl  $CH_3$ ).  $^{13}C\{^1H\}$  NMR (126 MHz, pyridine- $d_5$ ):  $\delta_C$  163.10 (pyrrole C), 158.17 (imine CH), 158.12 (imine CH), 157.34 (pyrrole C), 139.06 (pyrrole C), 138.08 (pyrrole C), 129.86, 129.12, 119.26 (pyrrole CH), 116.59 (pyrrole CH), 113.40 (pyrrole CH), 109.97 (pyrrole CH), 68.33 (cyclohexane CH), 62.18 (cyclohexane CH), 54.25 (ethyl C), 38.77 (ethyl  $CH_2$ ), 36.64, 36.41, 34.89, 27.08, 26.86, 26.75, 26.55, 26.27, 26.09, 19.92, 12.23 (ethyl  $CH_3$ ).  $^7Li\{^1H\}$  NMR (194 MHz, pyridine- $d_5$ ):  $\delta_{Li}$  3.55. APPI-MS:  $[UO_2LiL](H^+)$  841.45693 m/z. IR: Asymmetric O-U-O stretch  $911.08\text{ cm}^{-1}$ . Expected: C, 56.82; H, 5.80; N, 11.69; %. Found: C, 56.96; H, 5.82; N, 11.51; %.

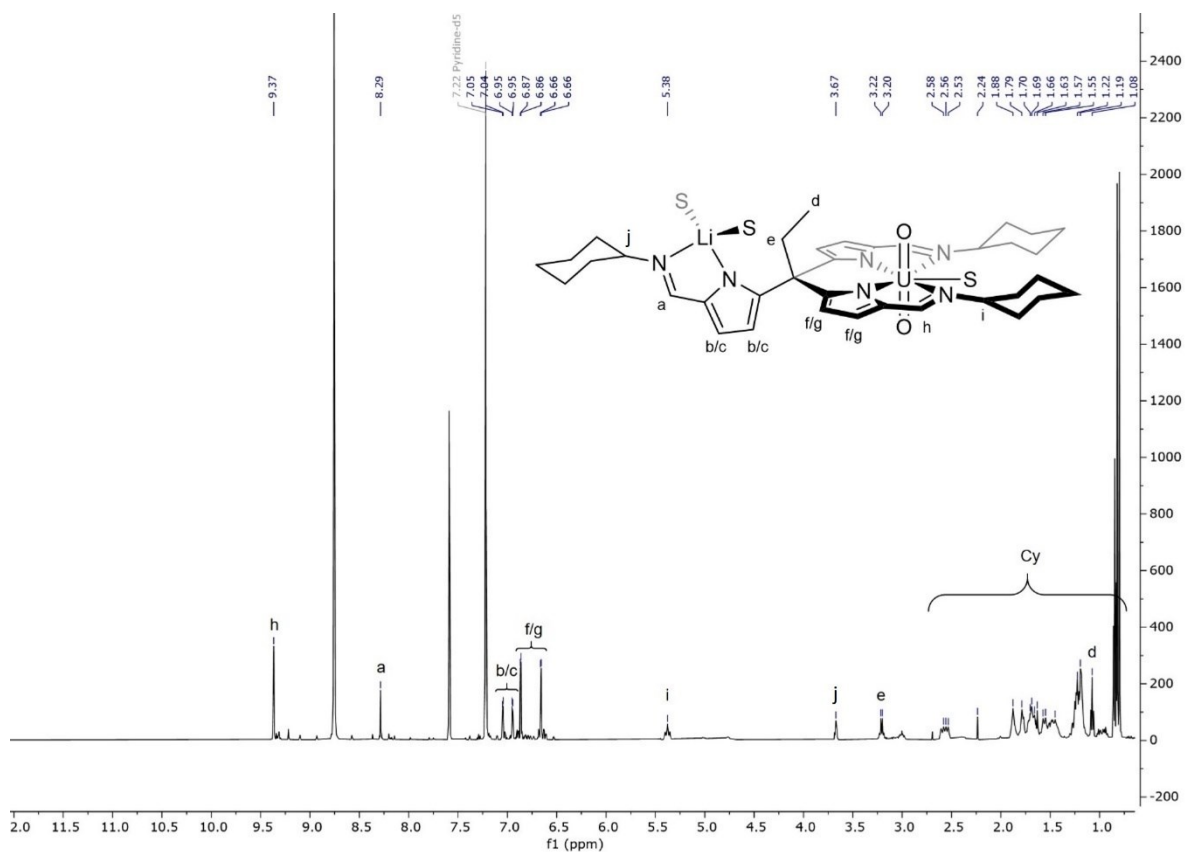

Figure SI 4.  $^1\text{H}$  NMR spectrum of **3** in  $d_5$ -pyridine.

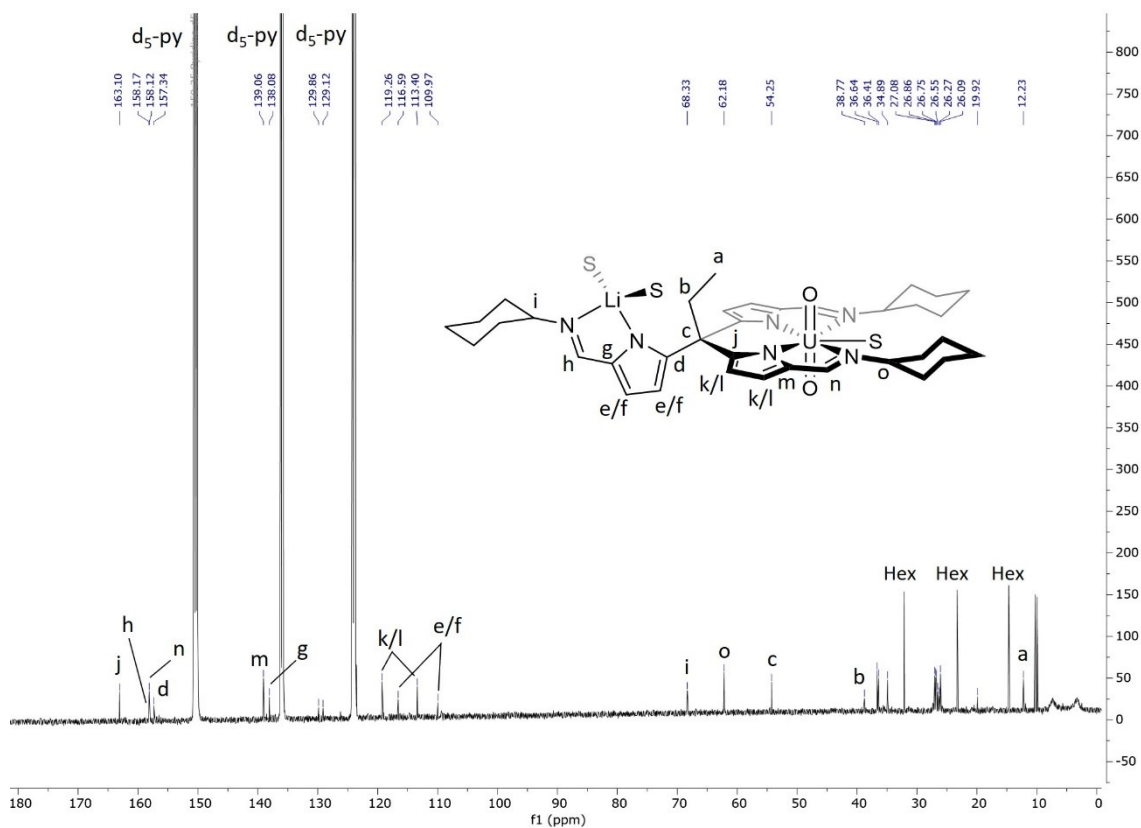

Figure SI 5.  $^{13}\text{C}\{^1\text{H}\}$  NMR spectrum of **3** in  $d_5$ -pyridine.



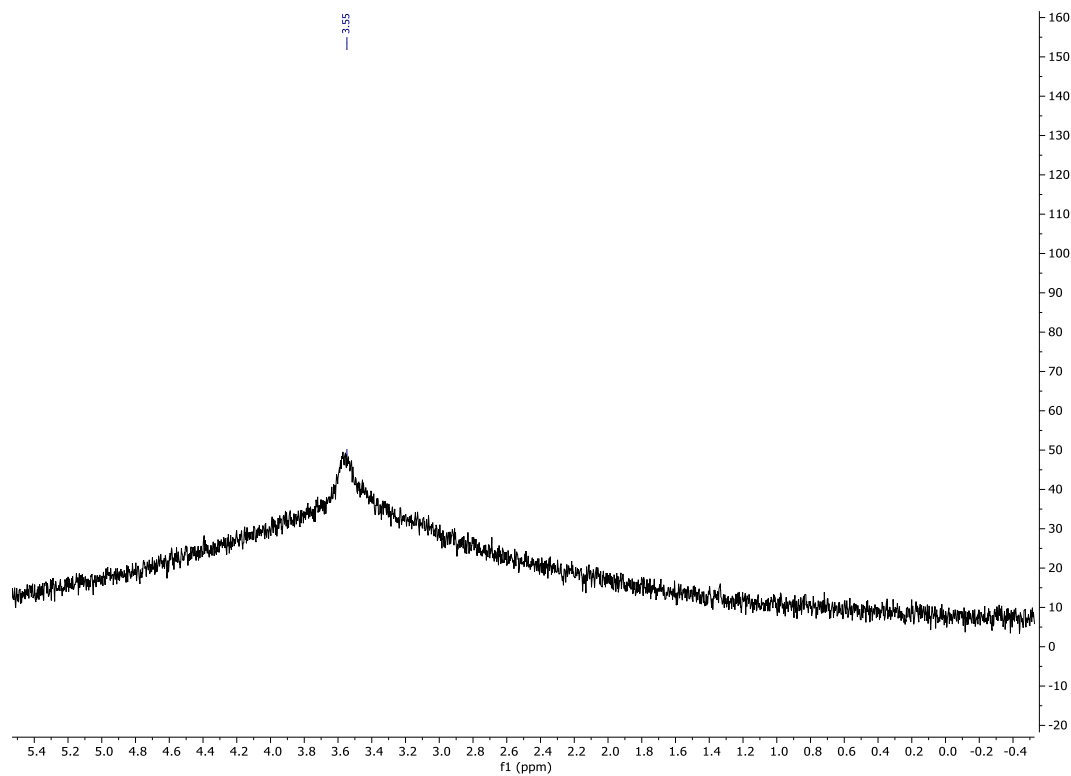

Figure SI 6.  ${}^7\text{Li}\{{}^1\text{H}\}$  NMR spectrum of **2-py** in  $d_5$ -pyridine.

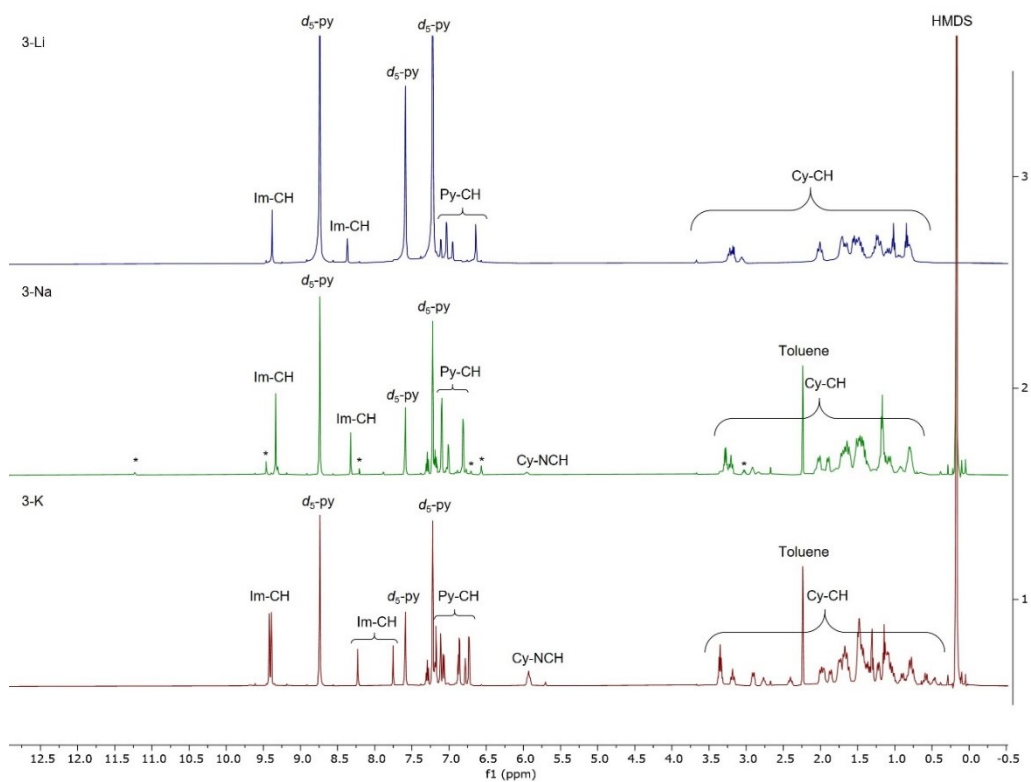

Figure SI 7. Stacked  ${}^1\text{H}$  NMR spectra of **3-Li** (TOP), **3-Na** (MIDDLE) and **3-K** (BOTTOM) in  $d_5$ -pyridine. \* = **2**.

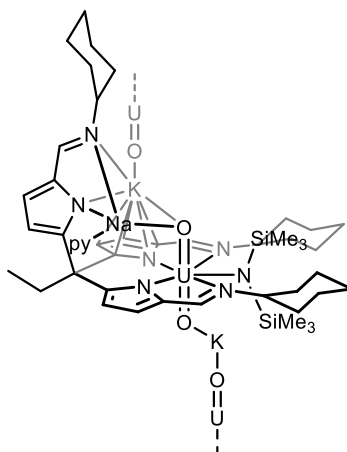

**$U^{VI}O_2(KNaL)(N(SiMe_3)_2)$ , 4-Na/K:** A solution of  $NaN(SiMe_3)_2$  (0.021 g, 0.115 mmol, 3.8 eq.) in dry pyridine (5 mL) was added to a solution of **1** (0.050 g, 0.030 mmol) in pyridine (15 mL) under a nitrogen atmosphere and stirred for 16 hours at room temperature. The solvent and  $HN(SiMe_3)_2$  was removed under vacuum and the brown solid mixture of **4-Na/K** and the presumed **5-Na** were re-dissolved in pyridine. X-ray quality crystals of **4-Na/K** were obtained by vapour diffusion of hexane into the pyridine solution. No yield of pure **4-Na/K** was obtained. X-ray quality crystals were grown by slow diffusion of dry hexane layered on a saturated pyridine solution of **4-Na/K** and **5-Na**. The origin of the potassium in the structure is unknown, but likely due to contamination of the  $NaN(SiMe_3)_2$ .  $^1H$  NMR (500 MHz, pyridine- $d_5$ ):  $\delta_H$  9.36 (s, 2H, imine CH), 7.67 (s, 1H, imine CH), 7.12 (d,  $J = 3.4$  Hz, 2H, pyrrole CH), 6.82 (d,  $J = 3.4$  Hz, 2H, pyrrole CH), 6.64 (d,  $J = 3.1$  Hz, 1H, pyrrole CH), 6.60 (d,  $J = 3.2$  Hz, 1H, pyrrole CH), 5.17 – 5.05 (m, 2H, cy NCH), 3.23 (q,  $J = 7.3$  Hz, 2H, ethyl  $CH_2$ ), 2.53 – 2.44 (m, 1H, cy NCH), 2.36 (dd,  $J = 26.5, 12.3$  Hz, 4H, cy), 1.82 – 1.77 (m, 8H, cy), 1.71 – 1.67 (m, 5H, cy), 1.49 – 1.40 (m, 2H, cy), 1.35 (t, 3H, ethyl  $CH_3$ ), 1.26 (dd,  $J = 12.4, 3.7$  Hz, 4H, cy), 1.08 – 0.99 (m, 2H, cy), 0.94 – 0.86 (m, 2H, cy), 0.82 (d,  $J = 6.3$  Hz, 2H, cy), 0.72 (s, 9H,  $SiMe_3$ ), 0.68 (s, 9H,  $SiMe_3$ ).  $^{13}C\{^1H\}$  NMR (126 MHz, pyridine- $d_5$ ):  $\delta_C$  161.80 (pyrrole C), 160.05 (pyrrole C), 158.18, 157.18, 137.75 (pyrrole C), 136.57 (pyrrole C), 121.33 (pyrrole CH), 117.06 (pyrrole CH), 111.67 (pyrrole CH), 105.40 (pyrrole CH), 67.83 (cy CH), 62.50 (cy CH), 53.57 (Et C), 36.01, 35.28, 34.96, 33.98 (Et  $CH_2$ ), 26.69, 26.44, 26.36, 26.34, 26.19, 25.44, 11.92 (Et  $CH_3$ ), 9.69 ( $SiMe_3$ ), 9.27 ( $SiMe_3$ ).  $^{29}Si\{^1H\}$  NMR (99 MHz, pyridine- $d_5$ ):  $\delta_{Si}$  -6.34, -7.14. APPI-MS:  $[UO_2(KNaL)(N(SiMe_3)_2)](H^+)$  1056.50492 m/z.

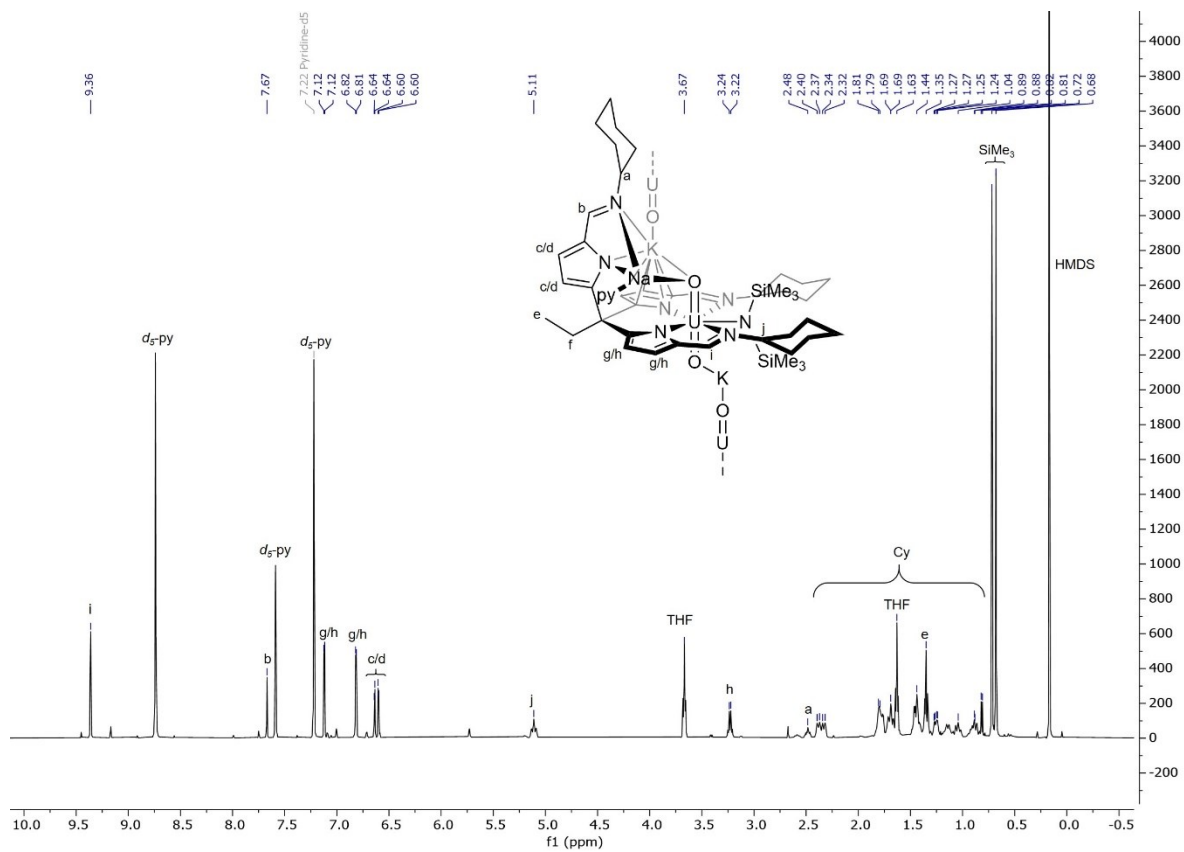

Figure SI 8.  $^1\text{H}$  NMR spectrum of **4-Na/K** in  $d_5$ -pyridine.

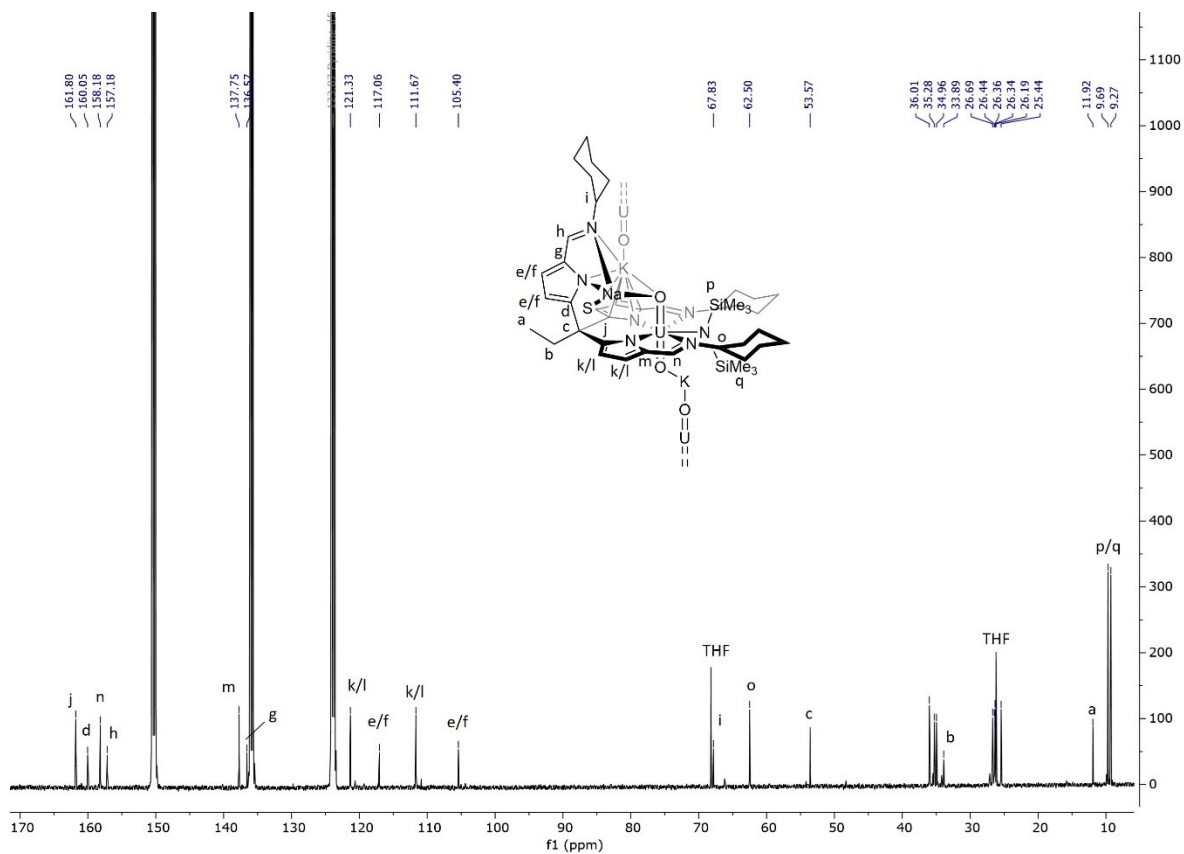

Figure SI 9.  $^{13}\text{C}\{^1\text{H}\}$  NMR spectrum of **4-Na/K** in  $d_5$ -pyridine.

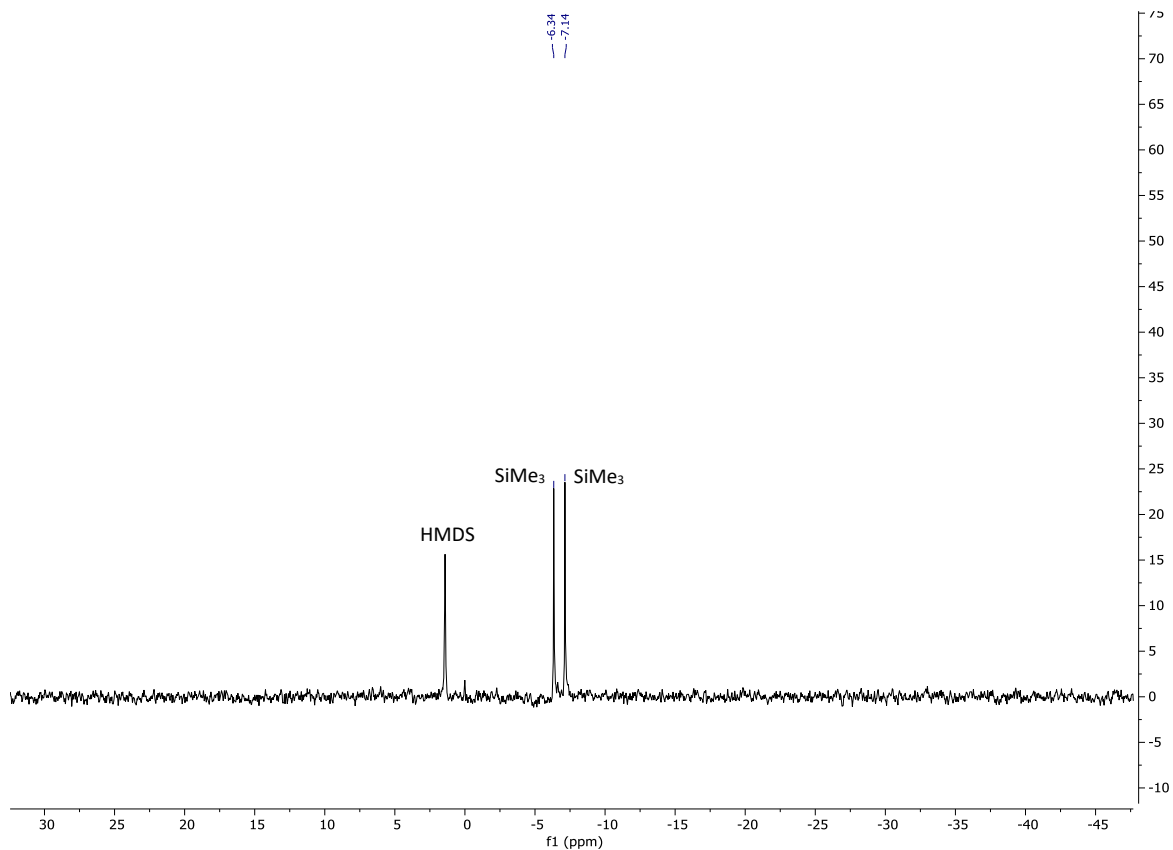

Figure SI 10.  $^{29}\text{Si}\{^1\text{H}\}$  NMR spectrum of **4-Na** in  $d_5$ -pyridine.

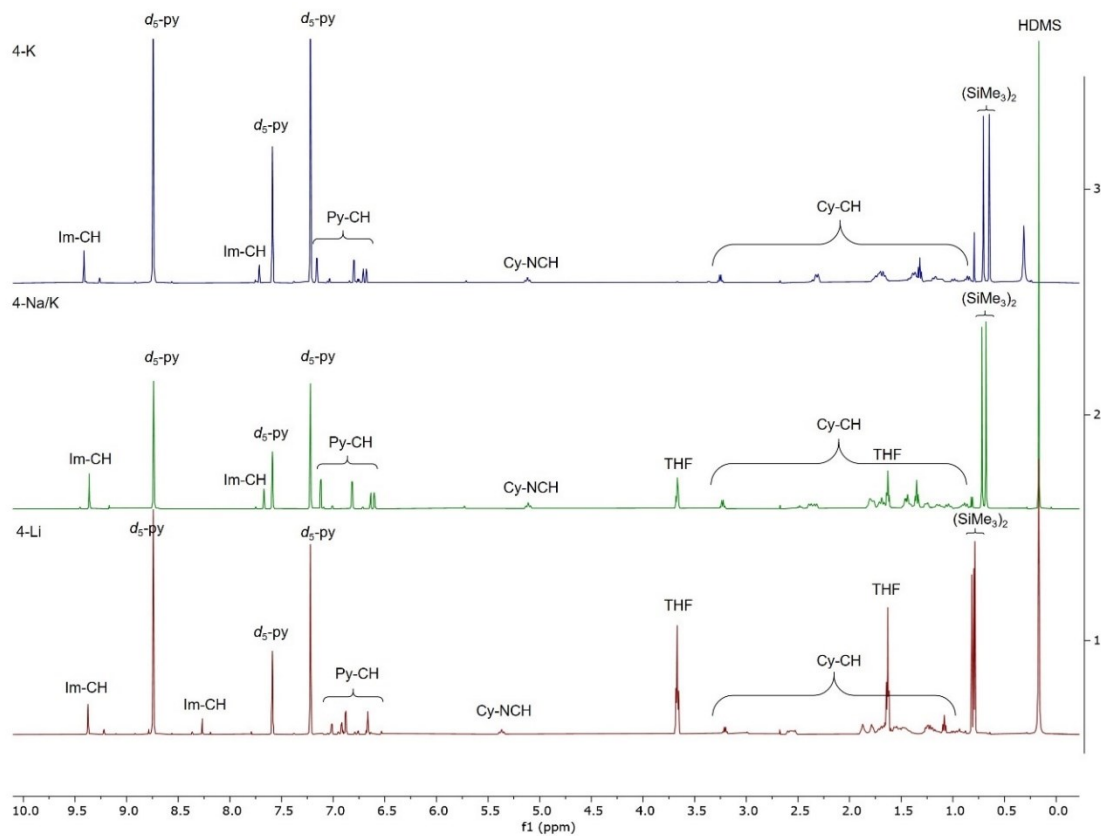

Figure SI 11. Stacked  $^1\text{H}$  NMR spectra of **4-K** (TOP), **4-Na** (MIDDLE) and **4-Li** (BOTTOM) in  $d_5$ -pyridine.

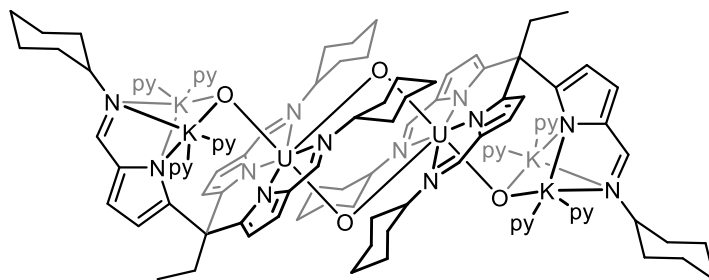

**[U<sup>V</sup>O<sub>2</sub>(K<sub>2</sub>L)(py)<sub>4</sub>]<sub>2</sub>, 5-K:** A solution of KN(SiMe<sub>3</sub>)<sub>2</sub> (0.184 g, 0.922 mmol, 4 eq.) in dry pyridine (10 mL) was added to a solution of **1** (0.389 g, 0.233 mmol, 1 eq.) and DHA (0.084 g, 0.466 mmol, 2 eq.) in pyridine (20 mL) under an argon atmosphere. The dark purple/brown solution was stirred at room temperature for 2 hours before the solvent was removed under reduced pressure. The resulting pale brown solid was washed with dry hexane to afford the product (0.270 g, 0.110 mmol, 47 %). X-ray quality crystals of **5-K** were obtained by vapour diffusion of hexane into a pyridine solution. <sup>1</sup>H NMR (500 MHz, pyridine): δ<sub>H</sub> 14.72, 14.15, 10.54, 10.39, 7.90, 6.22, 5.63, 5.59, 3.01, -1.00, -1.02, -2.71, -3.00, -3.02, -4.23, -4.25, -4.47, -4.49, -5.23, -6.15, -6.77, -7.85, -8.07, -8.90, -11.35, -12.01, -13.54, -36.89. APPI-MS: [U<sup>V</sup>O<sub>2</sub>(K<sub>2</sub>L)](H<sup>+</sup>) 912.36153 m/z, [U<sup>V</sup>O<sub>2</sub>(K<sub>2</sub>L)]<sub>2</sub>(H<sup>+</sup>) 1823.72833 m/z. IR: Imine C=N 1601.16 cm<sup>-1</sup>, pyrrole C-N 1045.10 cm<sup>-1</sup>, U-O 665.84 cm<sup>-1</sup>.

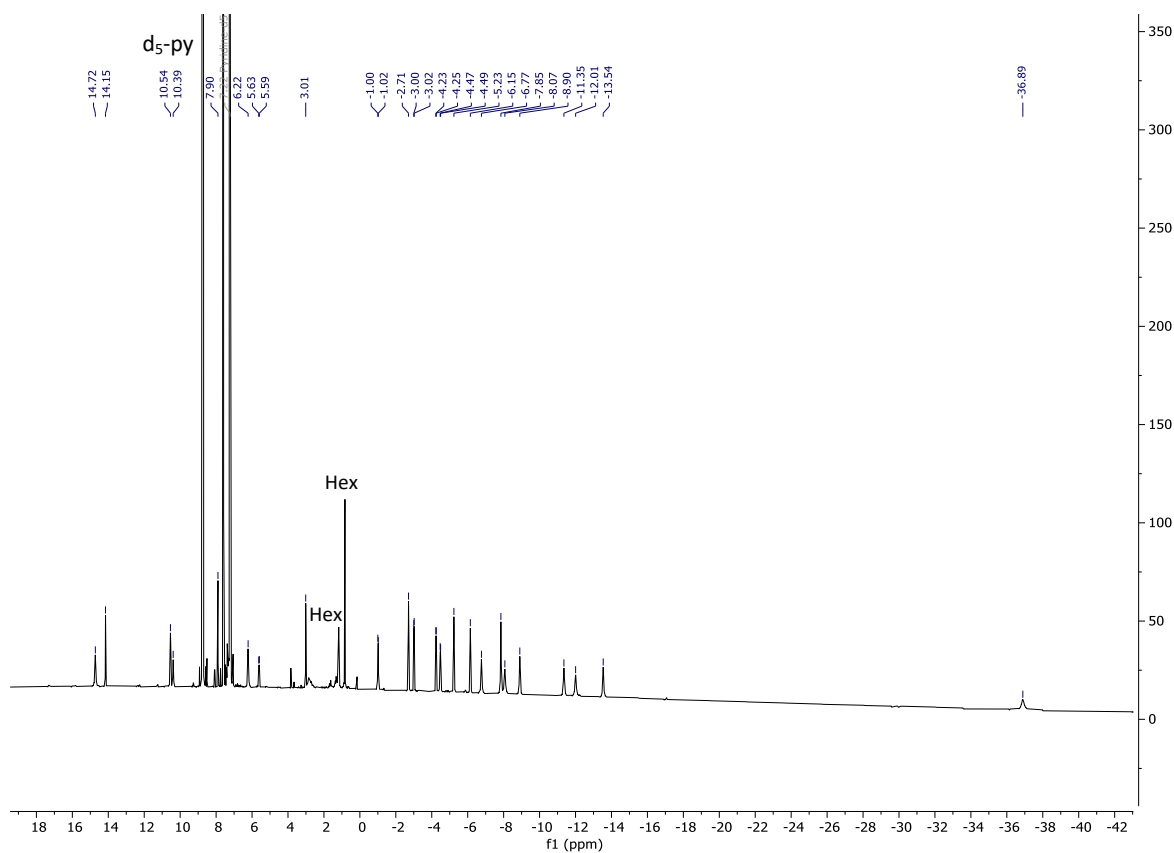

**Figure SI 12.** <sup>1</sup>H NMR spectrum of **5-K** in *d*<sub>5</sub>-pyridine.

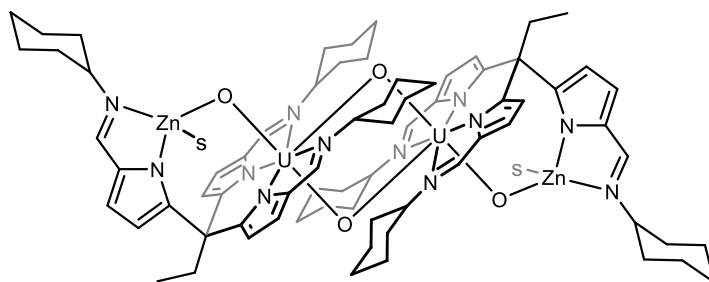

**[U<sup>V</sup>O<sub>2</sub>Zn(L)(py)<sub>2</sub>]<sub>2</sub>, 6-Zn:** A solution of ZnCl<sub>2</sub> (13 mg, 0.093 mmol, 2 eq.) in dry THF (5 mL) was added to a solution of **5-K** (100 mg, 0.048 mmol) in (5 mL) and the mixture was stirred at room temperature for 16 hours, after which a colourless precipitate formed. The mixture was filtered and the solvent removed from the pale orange/brown filtrate under reduced pressure. The brown solid was washed with dry hexane to obtain the product (30 mg, 0.015 mmol, 37 %). X-ray quality crystals were grown by vapour diffusion of hexane into a solution of **6-Zn** in pyridine. <sup>1</sup>H NMR (500 MHz, pyridine-*d*<sub>5</sub>): δ<sub>H</sub> 18.78 (s, 4H), 17.23 (s, 2H), 14.38 (s, 2H), 13.84 (s, 4H), 9.82 (d, *J* = 2.0 Hz, 2H), 6.97 (s, 4H), 5.83 (s, 4H), 5.37 (s, 2H), 5.14 (s, 2H), 3.66 (s, 4H), 1.66 – 1.59 (m, 4H), 0.28 – 0.21 (m, 4H), -1.10 (d, *J* = 3.6 Hz, 4H), -2.10 (d, *J* = 11.1 Hz, 4H), -3.47 (q, *J* = 12.4 Hz, 4H), -3.66 – -3.70 (m, 8H), -3.92 (s, 4H), -4.22 (s, 4H), -6.20 (s, 4H), -7.94 (s, 4H), -8.17 (d, *J* = 12.9 Hz, 4H), -9.92 (s, 4H), -10.35 (s, 4H), -12.60 (d, *J* = 11.0 Hz, 4H), -29.39 (s, 4H). IR: Imine C=N 1588.33 cm<sup>-1</sup>, pyrrole C-N 1043.68 cm<sup>-1</sup>, U-O 660.14 cm<sup>-1</sup>. APPI-MS: [UO<sub>2</sub>ZnL]<sup>+</sup> 897.36390 m/z.

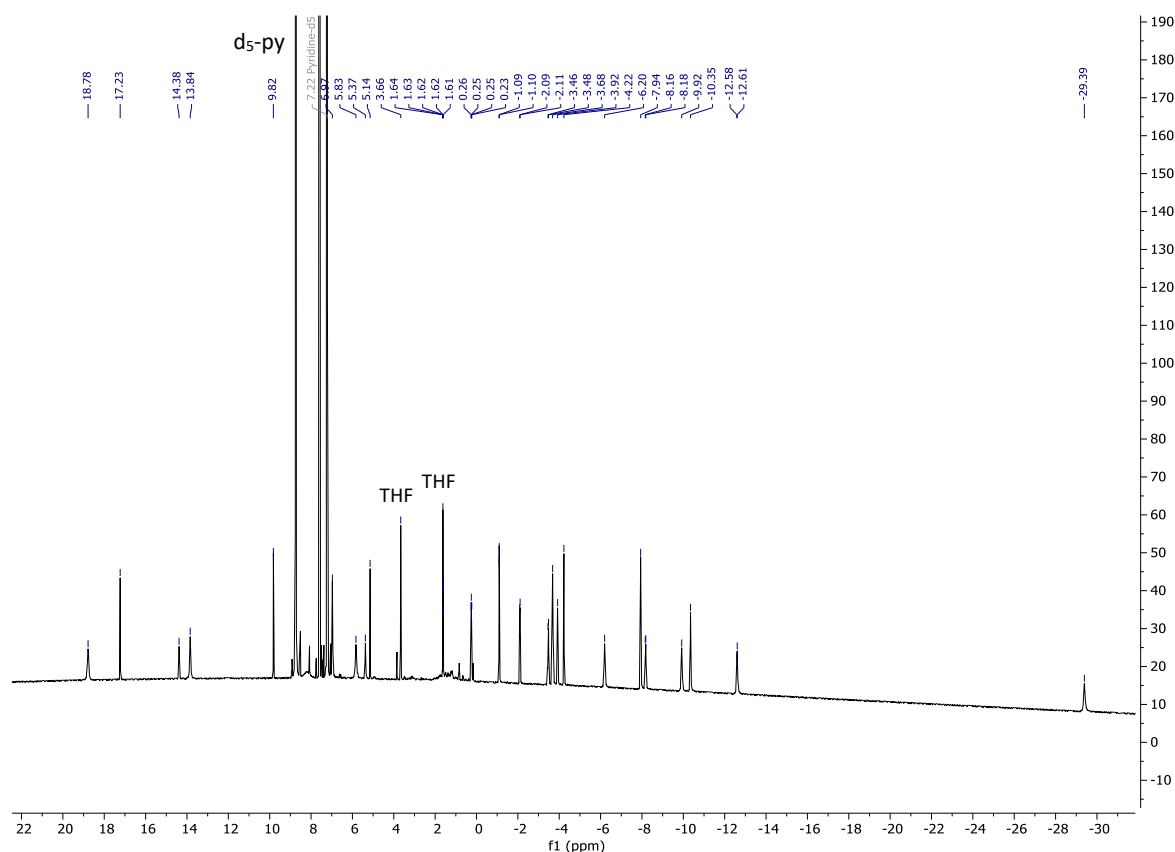

**Figure SI 13.** <sup>1</sup>H NMR spectrum of **6-Zn** in *d*<sub>5</sub>-pyridine.

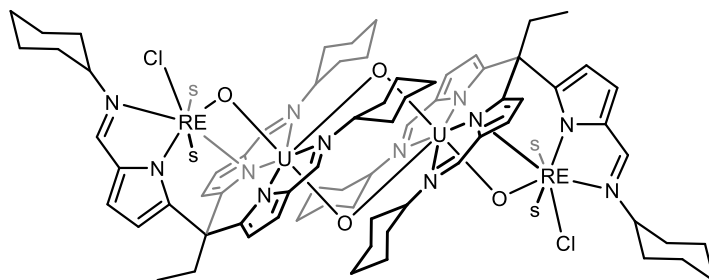

**[U<sup>VO<sub>2</sub>Y(Cl)(L)(py)<sub>2</sub>]<sub>2</sub>, 6-Y:</sup>** A solution of **5-K** (60 mg, 0.048 mmol) in dry THF (5 mL) was added to a suspension of YCl<sub>3</sub> (11 mg, 0.096 mmol, 2 eq.) in THF (5 mL) and the mixture was stirred at room temperature for 16 hours, after which a the solution became paler and a colourless precipitate formed. The mixture was filtered and the solvent removed from the pale brown filtrate under vacuum. After washing with hexane the product was obtained as a pale yellow solid (55 mg, 0.025 mmol, 89 %). X-ray quality crystals were grown by vapour diffusion of hexane into a solution of **6-Y** in pyridine. <sup>1</sup>H NMR (601 MHz, pyridine-*d*<sub>5</sub>): δ<sub>H</sub> 17.38, 17.16, 13.79, 13.72, 11.69, 11.49, 10.48, 9.45, 8.59, 8.51, 8.42, 7.70, 7.22, 6.59, 6.06, 5.60, 5.49, 5.03, 4.79, 4.51, 4.33, 4.27, 3.66, 3.65, 3.64, 3.09, 1.62, 1.16, 0.61, 0.14, -0.36, -1.55, -2.23, -2.38, -2.39, -3.71, -3.87, -4.41, -4.62, -4.81, -5.16, -5.45, -5.78, -5.99, -7.77, -8.03, -9.51, -10.17, -10.30, -11.45, -11.95, -12.35, -13.08, -16.08, -17.72, -30.80. IR: Imine C=N 1595.46 cm<sup>-1</sup>, pyrrole C-N 1046.53 cm<sup>-1</sup>, U-O 671.55 cm<sup>-1</sup>. APPI-MS: [UO<sub>2</sub>Y(Cl)(L)]<sup>+</sup> 957.31107 m/z.

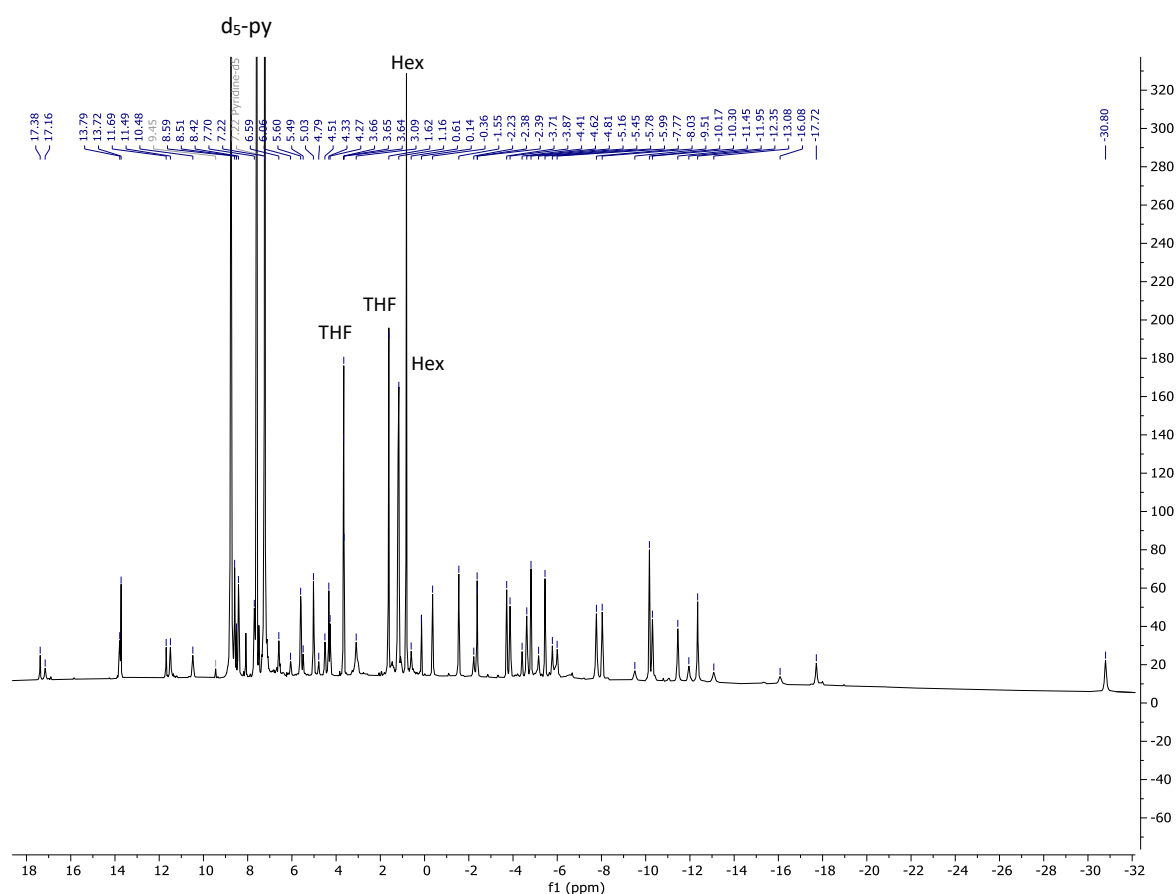

**Figure SI 14.** <sup>1</sup>H NMR spectrum of **6-Y** in *d*<sub>5</sub>-pyridine.

**[U<sup>v</sup>O<sub>2</sub>Dy(Cl)(L)(py)<sub>2</sub>]<sub>2</sub>, 6-Dy:** A solution of DyCl<sub>3</sub>(THF)<sub>2</sub> (47 mg, 0.114 mmol, 2 eq.) in THF (5 mL) was added to a solution of **5-K** (140 mg, 0.057 mmol) in dry THF (5 mL) and the solution was stirred at room temperature for 16 hours, after which a colourless precipitate formed. The mixture was filtered and the solvent removed from the brown filtrate under vacuum. After washing with hexane the product was obtained as a pale yellow-brown solid (64 mg, 0.027 mmol, 48 %). X-ray quality crystals were grown by vapour diffusion of hexane into a solution of **6-Dy** in pyridine. <sup>1</sup>H NMR (500 MHz, pyridine-*d*<sub>5</sub>): δ<sub>H</sub> 96.77, 85.91, 80.48, 63.09, 57.10, 44.06, 22.39, 21.95, 19.66, 18.15, 15.67, 12.90, 7.22, 3.05, -1.43, -2.93, -4.03, -4.49, -5.19, -5.62, -6.97, -7.60, -8.68, -9.44, -10.93, -12.25, -12.47, -18.93, -20.46, -26.48, -28.53, -33.63, -38.56, -41.26, -68.29. IR: Imine C=N 1598.31 cm<sup>-1</sup>, pyrrole C-N 1047.96 cm<sup>-1</sup>, U-O 670.12 cm<sup>-1</sup>. APPI-MS: [UO<sub>2</sub>DyCl]<sup>+</sup> 1032.33980 m/z.

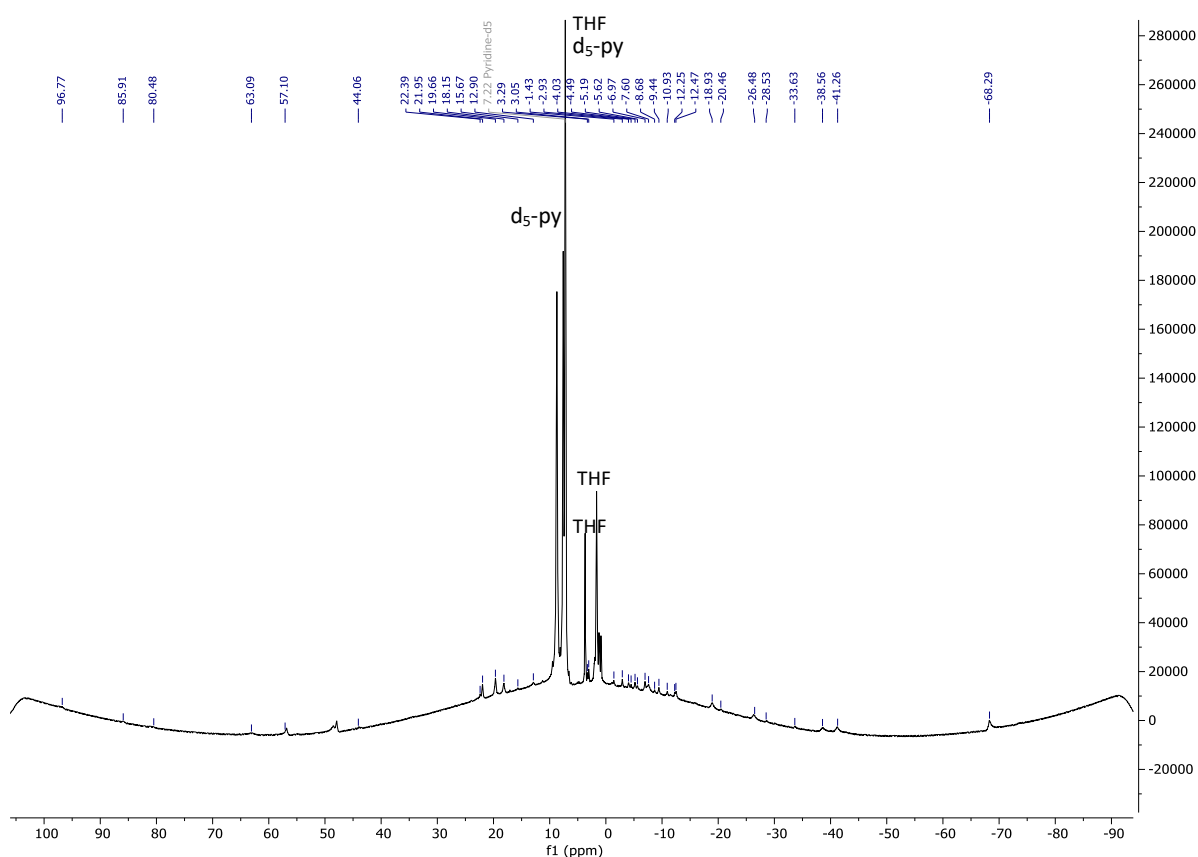

**Figure SI 15.** <sup>1</sup>H NMR spectrum of **6-Dy** in *d*<sub>5</sub>-pyridine.

**[U<sup>v</sup>O<sub>2</sub>Sm(Cl)(L)(py)<sub>2</sub>]<sub>2</sub>, 6-Sm:** A solution of SmCl<sub>3</sub>(THF)<sub>2</sub> (2 eq., 28 mg, 0.070 mmol) in dry THF (5 mL) was added to a stirred solution of **5-K** (85 mg, 0.035 mmol) in THF under a nitrogen atmosphere. The mixture was stirred at room temperature for 16 hours, after which a colourless precipitate formed. The mixture was filtered and the solvent removed from the brown filtrate under vacuum. After washing the resulting brown solid with hexane the product was obtained as a pale yellow solid (72 mg, 0.031 mmol, 86 %). X-ray quality crystals were grown by vapour diffusion of hexane into a solution



of **6-Sm** in pyridine. No NMR data could be obtained. IR: Imine C=N 1601.16  $\text{cm}^{-1}$ , pyrrole C-N 1046.53  $\text{cm}^{-1}$ , U-O 668.70  $\text{cm}^{-1}$ . APPI-MS:  $[\text{UO}_2\text{SmCl}]^+$  1022.33421  $m/z$ .

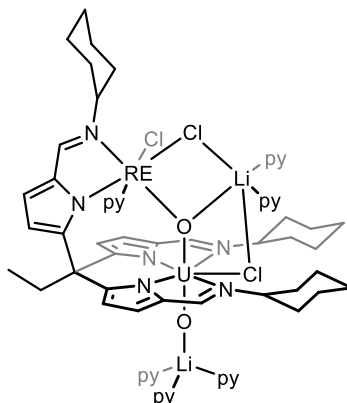

**$[\text{U}^{\text{V}}\text{O}_2\text{Y}(\text{Cl})(\text{LiCl})_2(\text{L})(\text{py})_6]$ , 6-Y'**: A solution of LiCl (3 mg, 0.071 mmol) in dry pyridine (2 mL) was added to a solution of **6-Y** (40 mg, 0.019 mmol) in dry pyridine (5 mL) under a nitrogen atmosphere. The mixture was stirred for 16 hours before the solvent was removed under reduced pressure. The resulting solid was washed with hexane to give the product as a pale yellow solid (34 mg, 0.022 mmol, 58%). X-ray quality crystals were grown by vapour diffusion of hexane into a pyridine solution of **6-Y'** in pyridine.  $^1\text{H}$  NMR (601 MHz, pyridine- $d_5$ ):  $\delta_{\text{H}}$  13.44, 12.81, 5.37, 4.70, 4.69, 4.07, 4.04, 2.09 (br), -0.47, -1.24, -1.94, -2.84, -3.34, -3.99, -4.38, -4.92, -6.54 (br), -7.32, -8.59 (br). IR: Imine C=N 1596.88  $\text{cm}^{-1}$ , pyrrole C-N 1047.96  $\text{cm}^{-1}$ , U-O 668.70  $\text{cm}^{-1}$ .

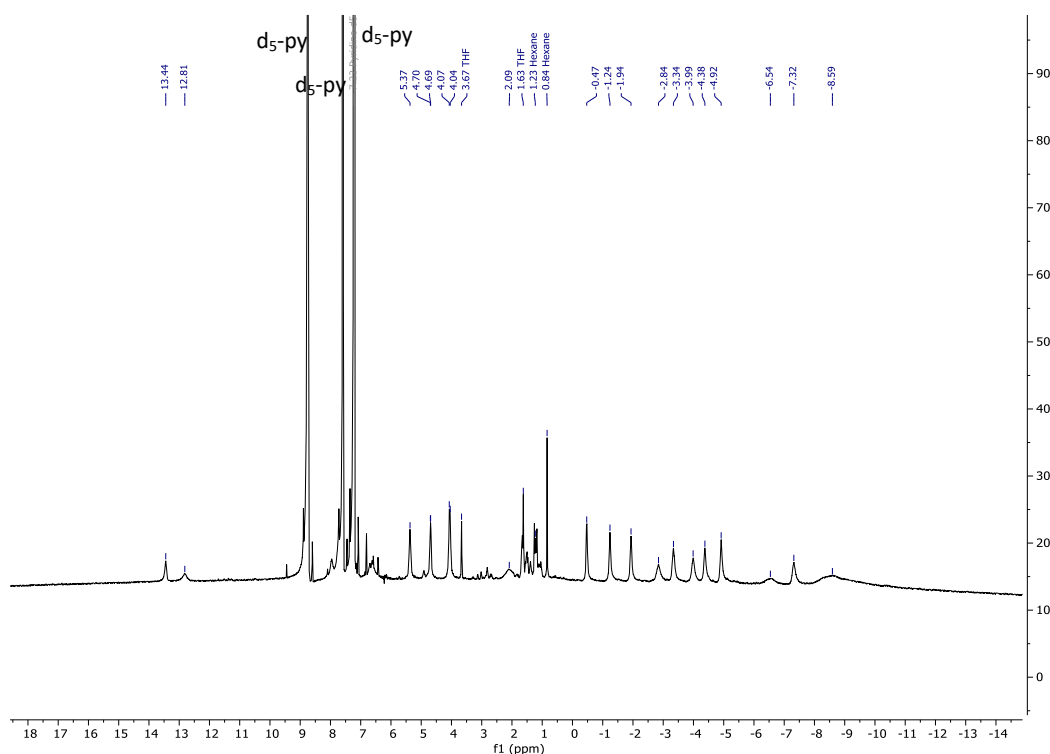

**Figure SI 16.**  $^1\text{H}$  NMR spectrum of **6-Y'** in  $d_5$ -pyridine.

**$[U^{IV}O_2Dy(Cl)(LiCl)_2(L)(py)_6]$ , 6-Dy'**: A solution of LiCl (3 mg, 0.071 mmol, 4 eq) in dry pyridine (2 mL) was added to a solution of **6-Dy** (37 mg, 0.016 mmol) in dry pyridine (5 mL) under a nitrogen atmosphere. The mixture was stirred for 16 hours before the solvent was removed from the resulting brown solution under reduced pressure. The resulting solid was washed with hexane to give the product as a pale yellow solid (29 mg, 0.018 mmol, 56%). X-ray quality crystals were grown by vapour diffusion of hexane into a pyridine solution of **6-Dy'** in pyridine. IR: Imine C=N 1598.31  $cm^{-1}$ , pyrrole C-N 1047.96  $cm^{-1}$ , U-O 670.12  $cm^{-1}$ .

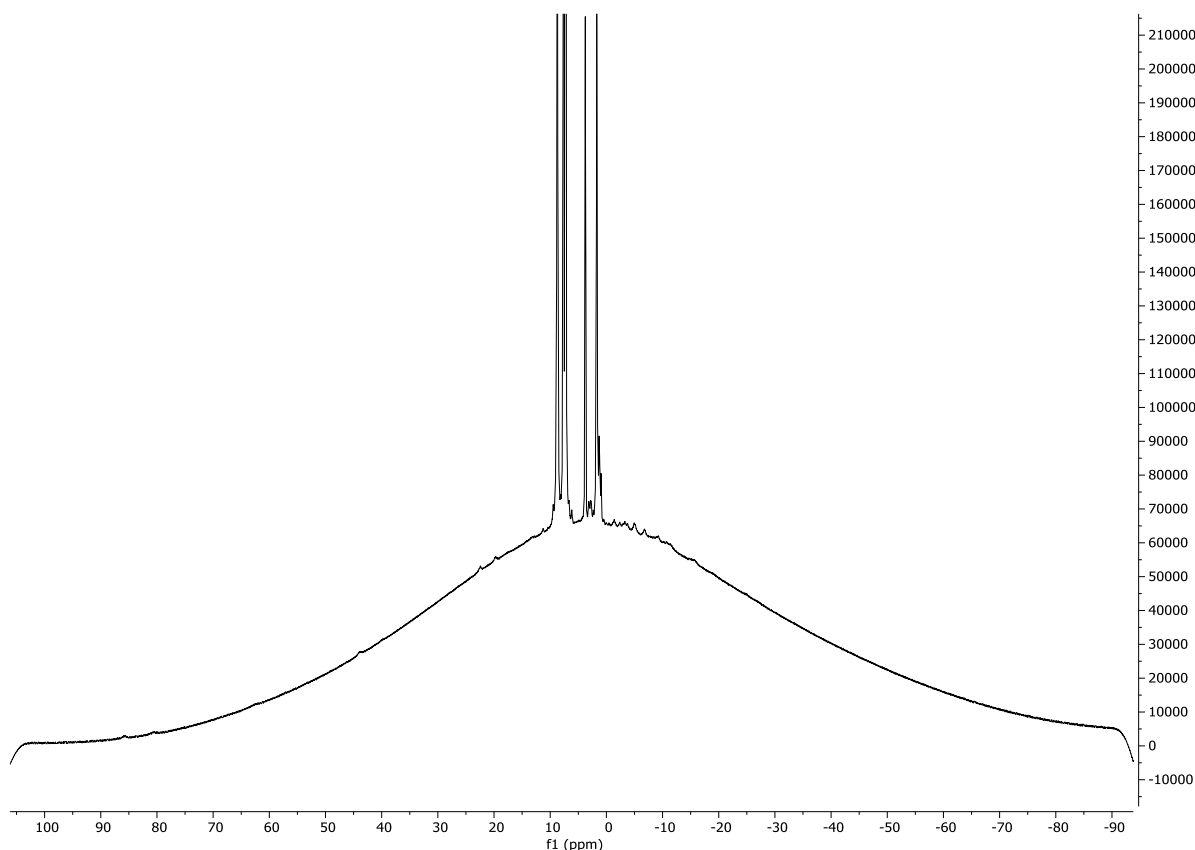

**Figure SI 17.**  $^1H$  NMR spectrum of **6-Dy'** in  $d_5$ -pyridine.

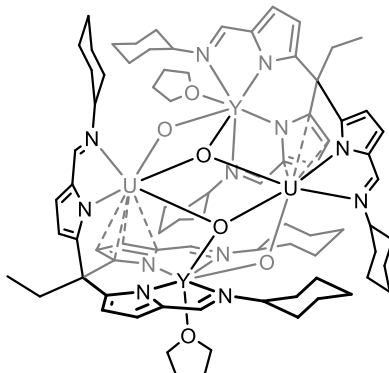

**$[U^{IV}O_2Y(L)]_2(THF)_2$ , 7-THF**:  $KC_8$  (12 mg, 0.089 mmol) was added to a solution of **6-Y** (90 mg, 0.041 mmol) in dry THF (5 mL) and stirred for 1 hour at room temperature, after which the brown solution darkened

and a black precipitate formed (graphite and KCl mixture). The solid graphite and KCl were removed by filtration and the solvent removed under vacuum to give the product as a brown solid after washing with hexane (68 mg, 0.034 mmol, 84%). X-ray quality crystals were grown by slow evaporation of a THF solution of **7-THF** (or by vapour diffusion of hexane into a pyridine solution to give  $[(U^{IV}O_2Y(L))_2\{py\}_3]$ , **7-py**).  $^1H$  NMR (500 MHz, pyridine- $d_5$ ):  $\delta_H$  79.29, 66.04, 57.96, 56.34, 40.58, 40.41, 31.34, 31.24, 28.91, 24.83, 23.84, 23.25, 23.16, 23.12, 22.62, 21.93, 21.90, 18.30, 17.78, 16.48, 16.43, 15.27, 14.69, 14.12, 10.53, 10.37, 9.90, 8.09, 7.86, 7.00, 6.76, 6.22, 5.85, 3.85, 2.97, 2.52, 0.60, 0.38, 0.17, -1.07, -1.39, -1.79, -2.70, -3.00, -3.02, -3.19, -3.23, -3.41, -3.45, -4.19, -4.47, -4.61, -5.16, -6.11, -6.82, -7.70, -8.11, -8.82, -9.07, -11.53, -11.85, -13.44, -16.66, -16.71, -17.41, -18.95, -25.90, -26.42, -26.47, -35.81, -62.06, -77.65. IR: Imine C=N 1586.90  $cm^{-1}$ , pyrrole C-N 1046.53  $cm^{-1}$ , U-O 537.52  $cm^{-1}$ .

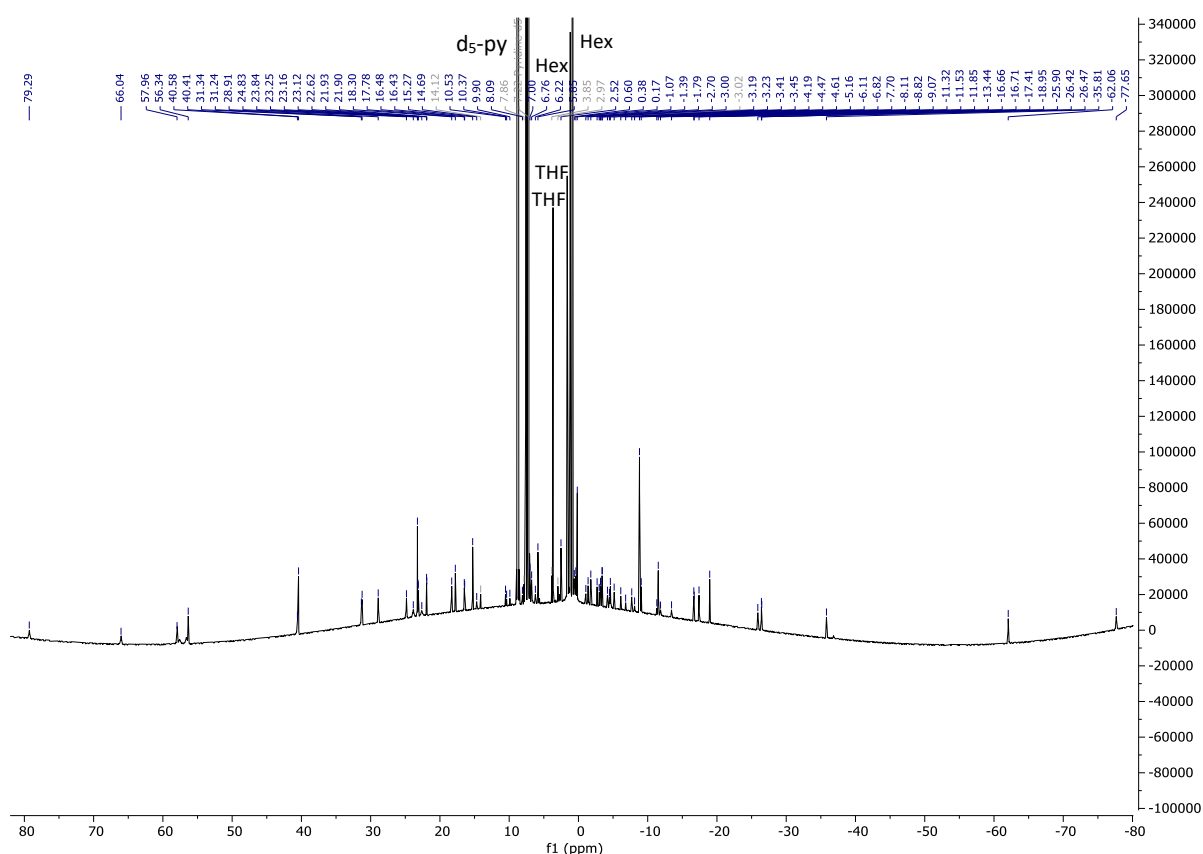

Figure SI 18.  $^1H$  NMR spectrum of **7-py** in  $d_5$ -pyridine.

## Infrared Spectroscopy

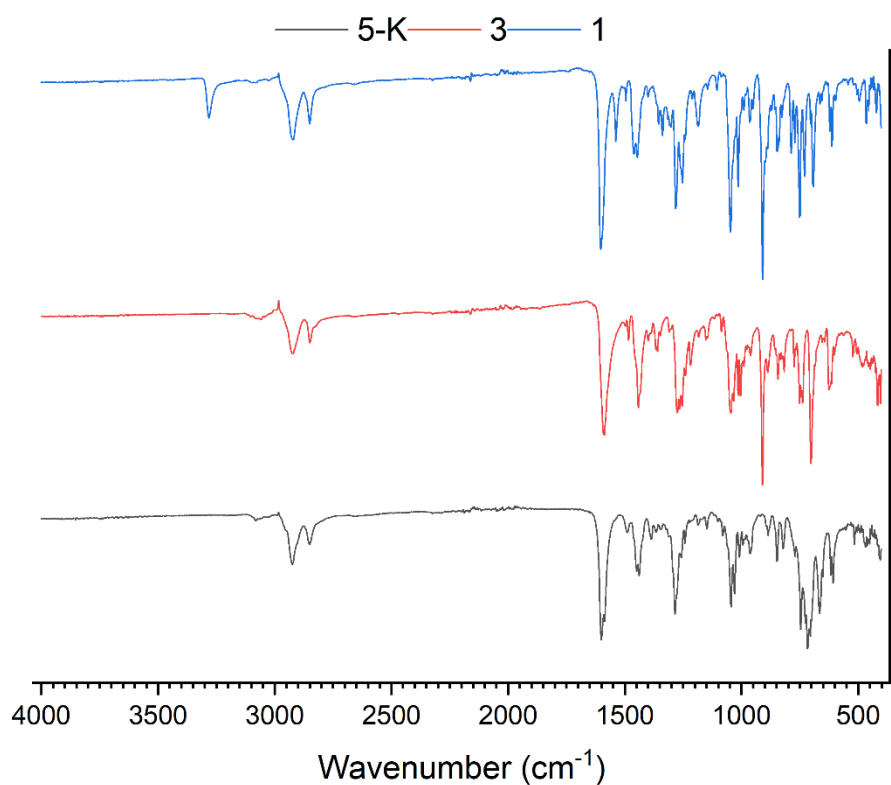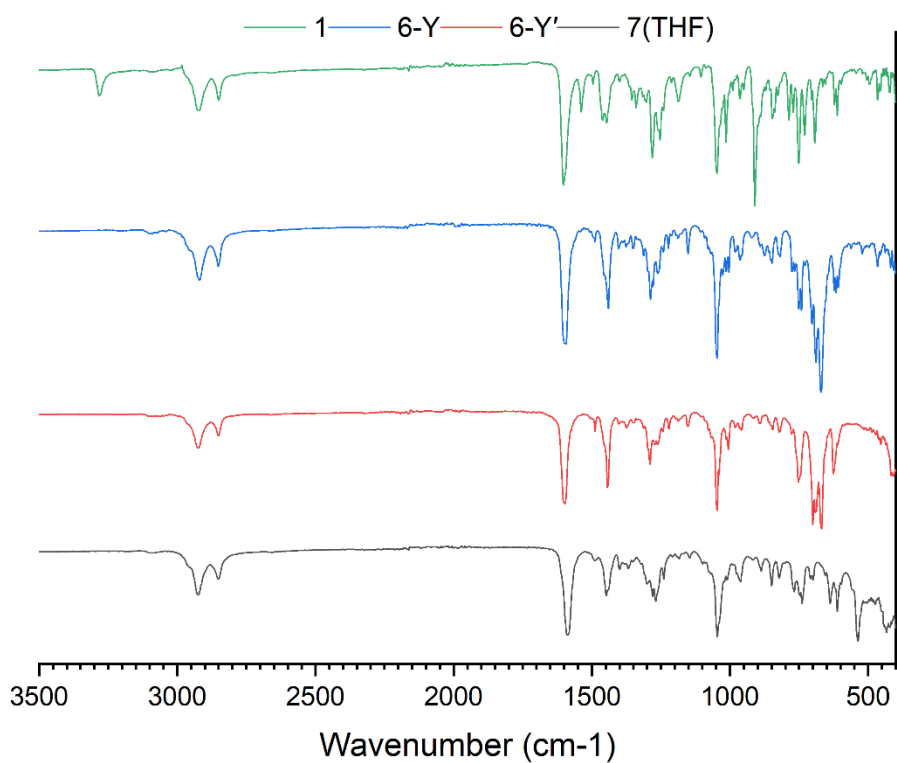

Figure SI 19. Stacked IR spectra of complexes 1, 3 and 5-K.

**Figure SI 20.** Stacked IR spectra of complexes **1**, **6-Y**, **6-Y'** and **7(THF)**.

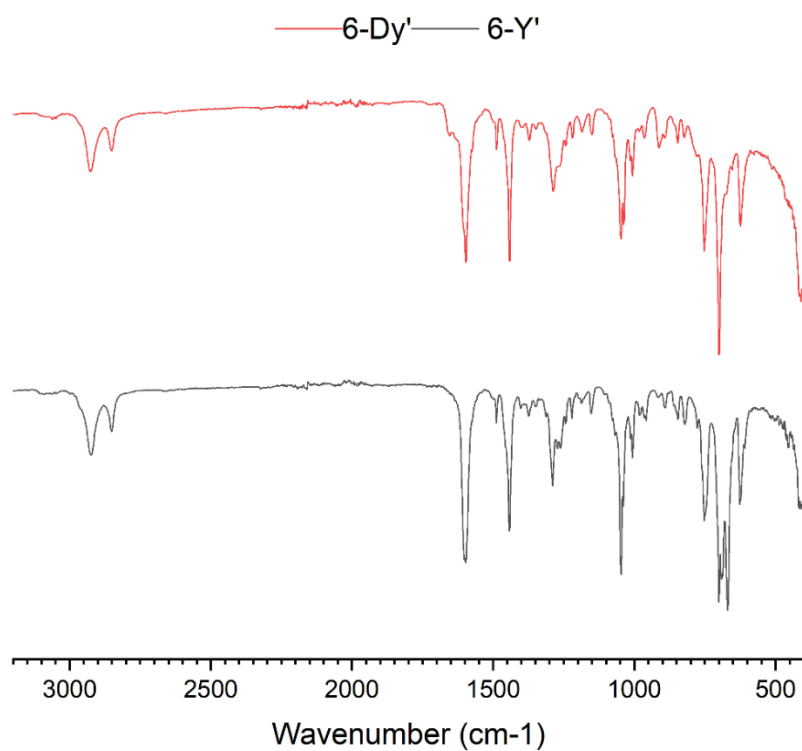

**Figure**

**SI 21.** Stacked IR spectra of complexes **5-K**, **6-Zn**, **6-Y**, **6-Sm** and **6-Dy**.

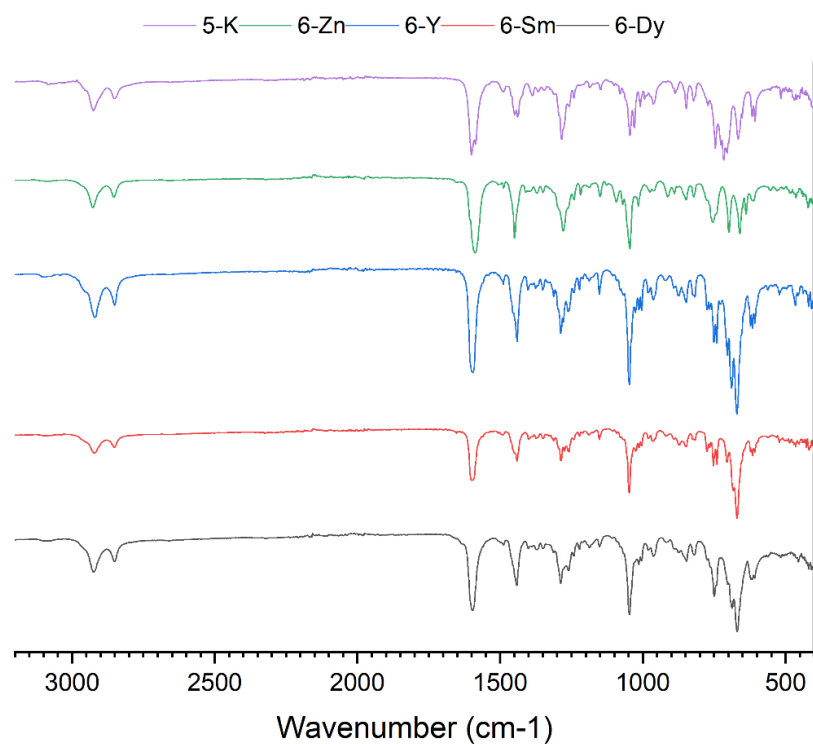

**Figure SI 22.** Stacked IR spectra of complexes **6-Y'** and **6-Dy'**.

## Electrochemistry

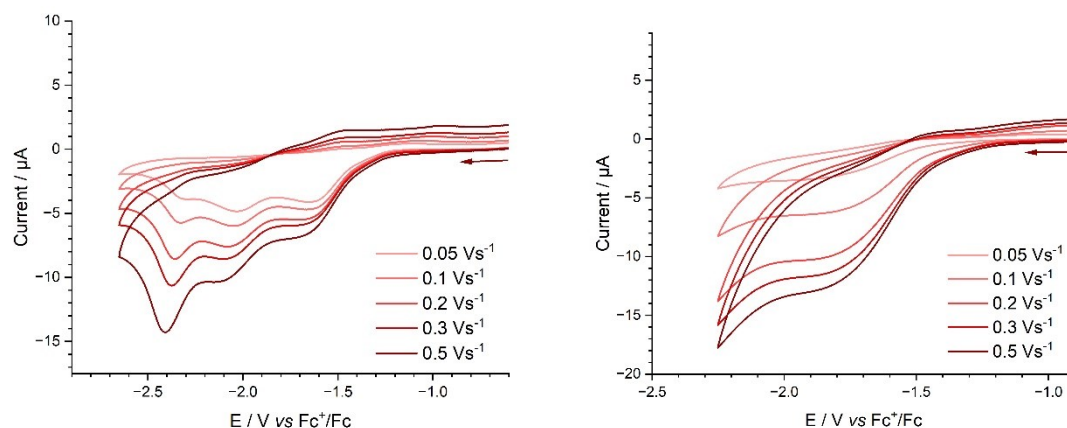

**Figure SI 23.** Cyclic voltammetry of a 2 mM solution of **2-THF** in 0.1 M [<sup>n</sup>Bu<sub>4</sub>N][PF<sub>6</sub>] electrolyte using a glassy-carbon working electrode, platinum gauze counter electrode and a silver wire pseudo-reference electrode. The spectra were referenced to ferrocene (Fc<sup>+</sup>/Fc) and run at scan-rates 0.05, 0.1, 0.2, 0.3 and 0.5 V s<sup>-1</sup>.

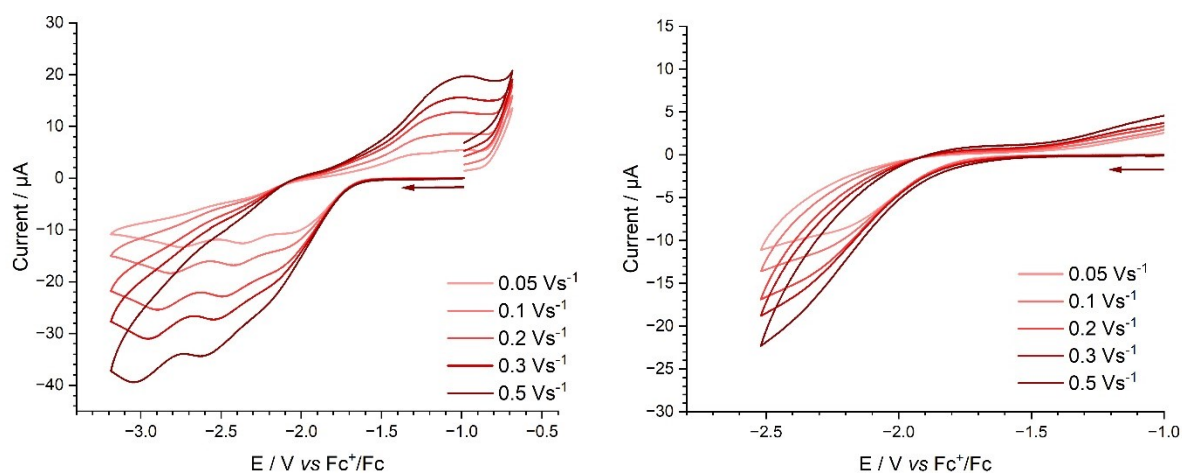

**Figure SI 24.** Cyclic voltammetry of a 10 mM solution of **3** in 0.1 M [<sup>n</sup>Bu<sub>4</sub>N][PF<sub>6</sub>] electrolyte using a glassy-carbon working electrode, platinum gauze counter electrode and a silver wire pseudo-reference electrode. The spectra were referenced to ferrocene (Fc<sup>+</sup>/Fc) and run at scan-rates 0.05, 0.1, 0.2, 0.3 and 0.5 V s<sup>-1</sup>.

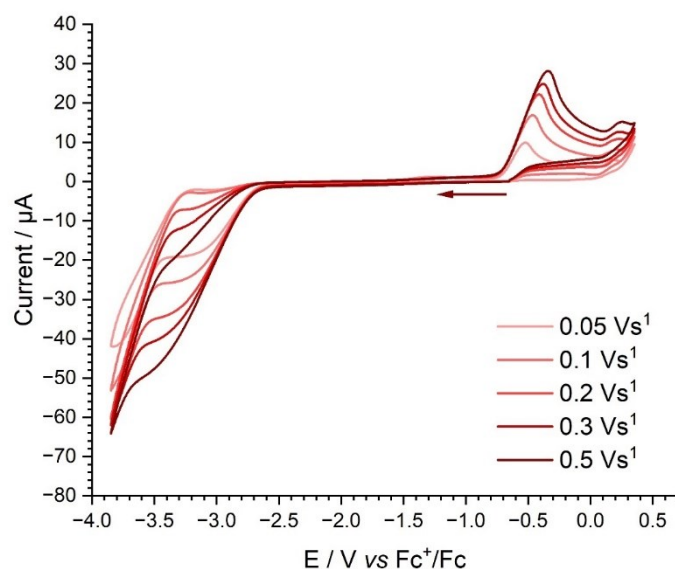

**Figure SI 25.** Cyclic voltammetry of a 10 mM solution of **H<sub>3</sub>L** in 0.1 M [<sup>n</sup>Bu<sub>4</sub>N][PF<sub>6</sub>] electrolyte using a glassy-carbon working electrode, platinum gauze counter electrode and a silver wire pseudo-reference electrode. The spectra were referenced to ferrocene (Fc<sup>+</sup>/Fc) and run at scan-rates 0.05, 0.1, 0.2, 0.3 and 0.5 V s<sup>-1</sup>. The irreversible oxidation at E<sub>p<sub>a</sub></sub> = -0.52 V vs Fc<sup>+</sup>/Fc is only present when scanning to the potential of the irreversible reduction at E<sub>p<sub>c</sub></sub> = -3.25 V vs Fc<sup>+</sup>/Fc.

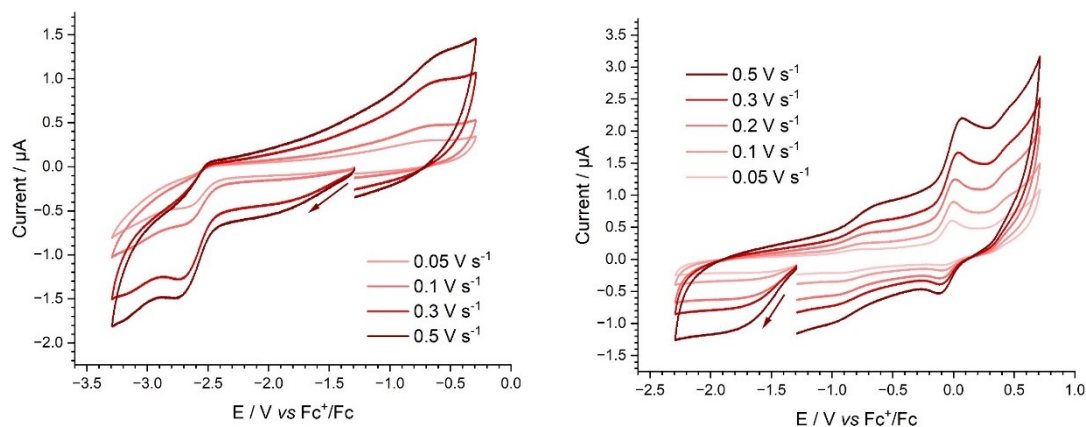

**Figure SI 26.** Cyclic voltammetry of a 1 mM solution of **6-Zn** in 0.1 M [<sup>n</sup>Bu<sub>4</sub>N][PF<sub>6</sub>] electrolyte using a glassy-carbon working electrode, platinum gauze counter electrode and a silver wire pseudo-reference electrode. The spectra were referenced to ferrocene (Fc<sup>+</sup>/Fc = 0 V) and run at scan-rates 0.05, 0.1, 0.2, 0.3 and 0.5 V s<sup>-1</sup>. The reversible reduction at 0 V is the Fc<sup>+</sup>/Fc redox couple.

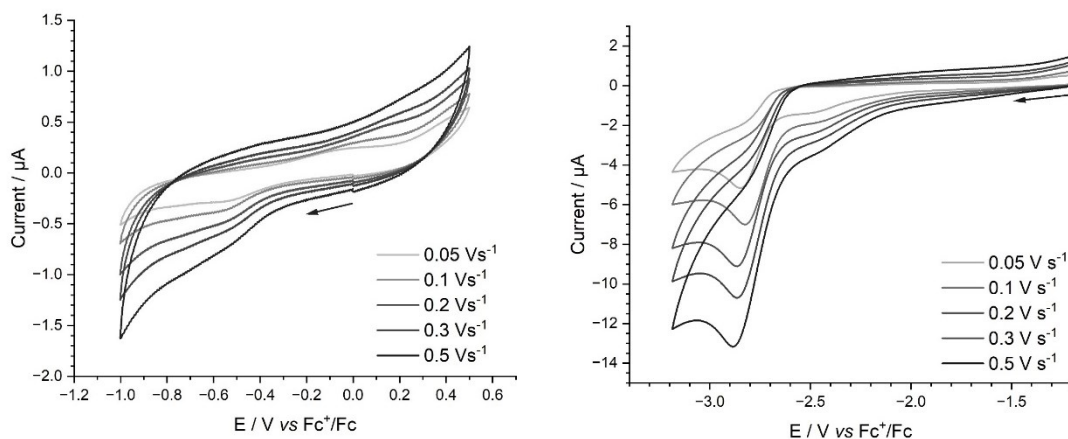

**Figure SI 27.** Cyclic voltammetry of a 1 mM solution of **6-Y** in 0.1 M  $[\text{nBu}_4\text{N}][\text{PF}_6]$  electrolyte using a glassy-carbon working electrode, platinum gauze counter electrode and a silver wire pseudo-reference electrode. The spectra were referenced to ferrocene ( $\text{Fc}^+/\text{Fc} = 0 \text{ V}$ ) and run at scan-rates 0.05, 0.1, 0.2, 0.3 and  $0.5 \text{ V s}^{-1}$ .

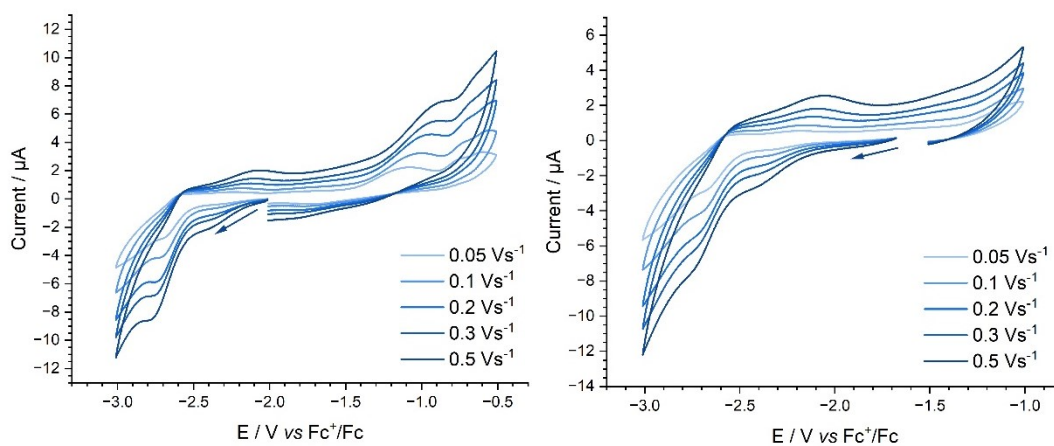

**Figure SI 28.** Cyclic voltammetry of a 1 mM solution of **5-K** in 0.1 M  $[\text{nBu}_4\text{N}][\text{PF}_6]$  electrolyte using a glassy-carbon working electrode, platinum gauze counter electrode and a silver wire pseudo-reference electrode. The spectra were referenced to ferrocene ( $\text{Fc}^+/\text{Fc} = 0 \text{ V}$ ) and run at scan-rates between 0.05 and  $0.5 \text{ V s}^{-1}$ .



## Crystallographic details

|                                                                                                                |                                                                                                                                                                                                                                                                                                                                                                                                       |
|----------------------------------------------------------------------------------------------------------------|-------------------------------------------------------------------------------------------------------------------------------------------------------------------------------------------------------------------------------------------------------------------------------------------------------------------------------------------------------------------------------------------------------|
|                                                                                                                | [UO <sub>2</sub> (HL)] <sub>2</sub> , 1                                                                                                                                                                                                                                                                                                                                                               |
| CCDC Number                                                                                                    | 2313497                                                                                                                                                                                                                                                                                                                                                                                               |
| Crystal data                                                                                                   |                                                                                                                                                                                                                                                                                                                                                                                                       |
| Chemical formula                                                                                               | C <sub>36</sub> H <sub>48</sub> N <sub>6</sub> O <sub>2</sub> U·C <sub>7</sub> H <sub>8</sub>                                                                                                                                                                                                                                                                                                         |
| <i>M</i> <sub>r</sub>                                                                                          | 926.96                                                                                                                                                                                                                                                                                                                                                                                                |
| Crystal system, space group                                                                                    | Monoclinic, <i>P</i> 2 <sub>1</sub> / <i>c</i>                                                                                                                                                                                                                                                                                                                                                        |
| Temperature (K)                                                                                                | 120                                                                                                                                                                                                                                                                                                                                                                                                   |
| <i>a</i> , <i>b</i> , <i>c</i> (Å)                                                                             | 14.6782 (2), 16.9971 (2), 18.3318 (2)                                                                                                                                                                                                                                                                                                                                                                 |
| β (°)                                                                                                          | 91.987 (1)                                                                                                                                                                                                                                                                                                                                                                                            |
| <i>V</i> (Å <sup>3</sup> )                                                                                     | 4570.79 (10)                                                                                                                                                                                                                                                                                                                                                                                          |
| <i>Z</i>                                                                                                       | 4                                                                                                                                                                                                                                                                                                                                                                                                     |
| Radiation type                                                                                                 | Mo <i>K</i> α                                                                                                                                                                                                                                                                                                                                                                                         |
| μ (mm <sup>-1</sup> )                                                                                          | 3.59                                                                                                                                                                                                                                                                                                                                                                                                  |
| Crystal size (mm)                                                                                              | 0.31 × 0.26 × 0.12                                                                                                                                                                                                                                                                                                                                                                                    |
| Data collection                                                                                                |                                                                                                                                                                                                                                                                                                                                                                                                       |
| Diffractometer                                                                                                 | Xcalibur, Eos                                                                                                                                                                                                                                                                                                                                                                                         |
| Absorption correction                                                                                          | Analytical<br><i>CrysAlis PRO</i> 1.171.42.49 (Rigaku Oxford Diffraction, 2022) Analytical numeric absorption correction using a multifaceted crystal model based on expressions derived by R.C. Clark & J.S. Reid. (Clark, R. C. & Reid, J. S. (1995). <i>Acta Cryst. A</i> 51, 887-897) Empirical absorption correction using spherical harmonics, implemented in SCALE3 ABSPACK scaling algorithm. |
| <i>T</i> <sub>min</sub> , <i>T</i> <sub>max</sub>                                                              | 0.805, 0.915                                                                                                                                                                                                                                                                                                                                                                                          |
| No. of measured, independent and observed [ <i>I</i> > 2σ( <i>I</i> )] reflections                             | 51279, 11102, 9250                                                                                                                                                                                                                                                                                                                                                                                    |
| <i>R</i> <sub>int</sub>                                                                                        | 0.032                                                                                                                                                                                                                                                                                                                                                                                                 |
| (sin θ/λ) <sub>max</sub> (Å <sup>-1</sup> )                                                                    | 0.690                                                                                                                                                                                                                                                                                                                                                                                                 |
| Refinement                                                                                                     |                                                                                                                                                                                                                                                                                                                                                                                                       |
| <i>R</i> [ <i>F</i> <sup>2</sup> > 2σ( <i>F</i> <sup>2</sup> )], <i>wR</i> ( <i>F</i> <sup>2</sup> ), <i>S</i> | 0.024, 0.054, 1.02                                                                                                                                                                                                                                                                                                                                                                                    |
| No. of reflections                                                                                             | 11102                                                                                                                                                                                                                                                                                                                                                                                                 |
| No. of parameters                                                                                              | 470                                                                                                                                                                                                                                                                                                                                                                                                   |
| H-atom treatment                                                                                               | H-atom parameters constrained                                                                                                                                                                                                                                                                                                                                                                         |
| Δ <sub>max</sub> , Δ <sub>min</sub> (e Å <sup>-3</sup> )                                                       | 0.98, -0.68                                                                                                                                                                                                                                                                                                                                                                                           |

|                                                                                                                   |                                                                                                                                                                                              |
|-------------------------------------------------------------------------------------------------------------------|----------------------------------------------------------------------------------------------------------------------------------------------------------------------------------------------|
|                                                                                                                   | [UO <sub>2</sub> (HL)(THF)], 2-THF                                                                                                                                                           |
| CCDC Number                                                                                                       | 2313498                                                                                                                                                                                      |
| Crystal data                                                                                                      |                                                                                                                                                                                              |
| Chemical formula                                                                                                  | C <sub>40</sub> H <sub>56</sub> N <sub>6</sub> O <sub>3</sub> U                                                                                                                              |
| <i>M</i> <sub>r</sub>                                                                                             | 906.93                                                                                                                                                                                       |
| Crystal system, space group                                                                                       | Triclinic, <i>P</i> <sup>-</sup> 1                                                                                                                                                           |
| Temperature (K)                                                                                                   | 120                                                                                                                                                                                          |
| <i>a</i> , <i>b</i> , <i>c</i> (Å)                                                                                | 11.5408 (7), 11.7266 (6), 15.0732 (7)                                                                                                                                                        |
| α, β, γ (°)                                                                                                       | 81.684 (4), 84.377 (4), 75.615 (5)                                                                                                                                                           |
| <i>V</i> (Å <sup>3</sup> )                                                                                        | 1951.09 (19)                                                                                                                                                                                 |
| <i>Z</i>                                                                                                          | 2                                                                                                                                                                                            |
| Radiation type                                                                                                    | Mo <i>K</i> α                                                                                                                                                                                |
| μ (mm <sup>-1</sup> )                                                                                             | 4.20                                                                                                                                                                                         |
| Crystal size (mm)                                                                                                 | 0.22 × 0.14 × 0.06                                                                                                                                                                           |
| Data collection                                                                                                   |                                                                                                                                                                                              |
| Diffractometer                                                                                                    | Xcalibur, Eos                                                                                                                                                                                |
| Absorption correction                                                                                             | Multi-scan<br><i>CrysAlis PRO</i> 1.171.42.81a (Rigaku Oxford Diffraction, 2023) Empirical absorption correction using spherical harmonics, implemented in SCALE3 ABSPACK scaling algorithm. |
| <i>T</i> <sub>min</sub> , <i>T</i> <sub>max</sub>                                                                 | 0.596, 1.000                                                                                                                                                                                 |
| No. of measured, independent and observed [ <i>I</i> > 2σ( <i>I</i> )] reflections                                | 15591, 15591, 12658                                                                                                                                                                          |
| <i>R</i> <sub>int</sub>                                                                                           | ?                                                                                                                                                                                            |
| (sin θ/λ) <sub>max</sub> (Å <sup>-1</sup> )                                                                       | 0.612                                                                                                                                                                                        |
| Refinement                                                                                                        |                                                                                                                                                                                              |
| <i>R</i> [ <i>F</i> <sup>2</sup> > 2σ( <i>F</i> <sup>2</sup> )],<br><i>wR</i> ( <i>F</i> <sup>2</sup> ), <i>S</i> | 0.039, 0.100, 0.99                                                                                                                                                                           |
| No. of reflections                                                                                                | 15591                                                                                                                                                                                        |
| No. of parameters                                                                                                 | 453                                                                                                                                                                                          |
| No. of restraints                                                                                                 | 460                                                                                                                                                                                          |
| H-atom treatment                                                                                                  | H-atom parameters constrained                                                                                                                                                                |
| Δ <sub>max</sub> , Δ <sub>min</sub> (e Å <sup>-3</sup> )                                                          | 2.24, -1.21                                                                                                                                                                                  |

|                                                                                                                |                                                                                                                                                                                                                                                                                                                                                                                                      |
|----------------------------------------------------------------------------------------------------------------|------------------------------------------------------------------------------------------------------------------------------------------------------------------------------------------------------------------------------------------------------------------------------------------------------------------------------------------------------------------------------------------------------|
|                                                                                                                | [UO <sub>2</sub> (HL)(py)], 2-py                                                                                                                                                                                                                                                                                                                                                                     |
| CCDC Number                                                                                                    | 2313499                                                                                                                                                                                                                                                                                                                                                                                              |
| Crystal data                                                                                                   |                                                                                                                                                                                                                                                                                                                                                                                                      |
| Chemical formula                                                                                               | C <sub>41</sub> H <sub>53</sub> N <sub>7</sub> O <sub>2</sub> U                                                                                                                                                                                                                                                                                                                                      |
| <i>M</i> <sub>r</sub>                                                                                          | 913.93                                                                                                                                                                                                                                                                                                                                                                                               |
| Crystal system, space group                                                                                    | Triclinic, <i>P</i> <sup>-</sup> 1                                                                                                                                                                                                                                                                                                                                                                   |
| Temperature (K)                                                                                                | 120                                                                                                                                                                                                                                                                                                                                                                                                  |
| <i>a</i> , <i>b</i> , <i>c</i> (Å)                                                                             | 11.3701 (3), 11.9785 (5), 14.9463 (4)                                                                                                                                                                                                                                                                                                                                                                |
| α, β, γ (°)                                                                                                    | 83.518 (3), 85.015 (2), 75.569 (3)                                                                                                                                                                                                                                                                                                                                                                   |
| <i>V</i> (Å <sup>3</sup> )                                                                                     | 1955.15 (11)                                                                                                                                                                                                                                                                                                                                                                                         |
| <i>Z</i>                                                                                                       | 2                                                                                                                                                                                                                                                                                                                                                                                                    |
| Radiation type                                                                                                 | Mo <i>K</i> α                                                                                                                                                                                                                                                                                                                                                                                        |
| μ (mm <sup>-1</sup> )                                                                                          | 4.20                                                                                                                                                                                                                                                                                                                                                                                                 |
| Crystal size (mm)                                                                                              | 0.31 × 0.09 × 0.07                                                                                                                                                                                                                                                                                                                                                                                   |
| Data collection                                                                                                |                                                                                                                                                                                                                                                                                                                                                                                                      |
| Diffractometer                                                                                                 | Xcalibur, Eos                                                                                                                                                                                                                                                                                                                                                                                        |
| Absorption correction                                                                                          | Analytical<br><i>CrysAlis PRO</i> 1.171.42.49 (Rigaku Oxford Diffraction, 2022) Analytical numeric absorption correction using a multifaceted crystal model based on expressions derived by R.C. Clark & J.S. Reid. (Clark, R. C. & Reid, J. S. (1995). <i>Acta Cryst.</i> A51, 887-897) Empirical absorption correction using spherical harmonics, implemented in SCALE3 ABSPACK scaling algorithm. |
| <i>T</i> <sub>min</sub> , <i>T</i> <sub>max</sub>                                                              | 0.631, 0.892                                                                                                                                                                                                                                                                                                                                                                                         |
| No. of measured, independent and observed [ <i>I</i> > 2σ( <i>I</i> )] reflections                             | 36204, 7952, 6812                                                                                                                                                                                                                                                                                                                                                                                    |
| <i>R</i> <sub>int</sub>                                                                                        | 0.055                                                                                                                                                                                                                                                                                                                                                                                                |
| (sin θ/λ) <sub>max</sub> (Å <sup>-1</sup> )                                                                    | 0.625                                                                                                                                                                                                                                                                                                                                                                                                |
| Refinement                                                                                                     |                                                                                                                                                                                                                                                                                                                                                                                                      |
| <i>R</i> [ <i>F</i> <sup>2</sup> > 2σ( <i>F</i> <sup>2</sup> )], <i>wR</i> ( <i>F</i> <sup>2</sup> ), <i>S</i> | 0.038, 0.090, 1.07                                                                                                                                                                                                                                                                                                                                                                                   |
| No. of reflections                                                                                             | 7952                                                                                                                                                                                                                                                                                                                                                                                                 |
| No. of parameters                                                                                              | 507                                                                                                                                                                                                                                                                                                                                                                                                  |
| No. of restraints                                                                                              | 516                                                                                                                                                                                                                                                                                                                                                                                                  |
| H-atom treatment                                                                                               | H-atom parameters constrained                                                                                                                                                                                                                                                                                                                                                                        |
| Δ <sub>max</sub> , Δ <sub>min</sub> (e Å <sup>-3</sup> )                                                       | 2.97, -1.42                                                                                                                                                                                                                                                                                                                                                                                          |

|                                                                                                                |                                                                                                                                                                                                                                                                                                                                                                                                      |
|----------------------------------------------------------------------------------------------------------------|------------------------------------------------------------------------------------------------------------------------------------------------------------------------------------------------------------------------------------------------------------------------------------------------------------------------------------------------------------------------------------------------------|
|                                                                                                                | [UO <sub>2</sub> (LiL)(py) <sub>3</sub> ], 3                                                                                                                                                                                                                                                                                                                                                         |
| CCDC Number                                                                                                    | 2313500                                                                                                                                                                                                                                                                                                                                                                                              |
| Crystal data                                                                                                   |                                                                                                                                                                                                                                                                                                                                                                                                      |
| Chemical formula                                                                                               | C <sub>51</sub> H <sub>62</sub> LiN <sub>9</sub> O <sub>2</sub> U                                                                                                                                                                                                                                                                                                                                    |
| <i>M<sub>r</sub></i>                                                                                           | 1078.06                                                                                                                                                                                                                                                                                                                                                                                              |
| Crystal system, space group                                                                                    | Monoclinic, <i>P2<sub>1</sub>/c</i>                                                                                                                                                                                                                                                                                                                                                                  |
| Temperature (K)                                                                                                | 120                                                                                                                                                                                                                                                                                                                                                                                                  |
| <i>a</i> , <i>b</i> , <i>c</i> (Å)                                                                             | 18.3220 (7), 13.2763 (4), 20.5072 (9)                                                                                                                                                                                                                                                                                                                                                                |
| β (°)                                                                                                          | 108.143 (4)                                                                                                                                                                                                                                                                                                                                                                                          |
| <i>V</i> (Å <sup>3</sup> )                                                                                     | 4740.3 (3)                                                                                                                                                                                                                                                                                                                                                                                           |
| <i>Z</i>                                                                                                       | 4                                                                                                                                                                                                                                                                                                                                                                                                    |
| Radiation type                                                                                                 | Mo <i>K</i> α                                                                                                                                                                                                                                                                                                                                                                                        |
| μ (mm <sup>-1</sup> )                                                                                          | 3.47                                                                                                                                                                                                                                                                                                                                                                                                 |
| Crystal size (mm)                                                                                              | 0.14 × 0.1 × 0.03                                                                                                                                                                                                                                                                                                                                                                                    |
| Data collection                                                                                                |                                                                                                                                                                                                                                                                                                                                                                                                      |
| Diffractometer                                                                                                 | Xcalibur, Eos                                                                                                                                                                                                                                                                                                                                                                                        |
| Absorption correction                                                                                          | Analytical<br><i>CrysAlis PRO</i> 1.171.42.49 (Rigaku Oxford Diffraction, 2022) Analytical numeric absorption correction using a multifaceted crystal model based on expressions derived by R.C. Clark & J.S. Reid. (Clark, R. C. & Reid, J. S. (1995). <i>Acta Cryst.</i> A51, 887-897) Empirical absorption correction using spherical harmonics, implemented in SCALE3 ABSPACK scaling algorithm. |
| <i>T<sub>min</sub></i> , <i>T<sub>max</sub></i>                                                                | 0.593, 0.839                                                                                                                                                                                                                                                                                                                                                                                         |
| No. of measured, independent and observed [ <i>I</i> > 2σ( <i>I</i> )] reflections                             | 50829, 10030, 7881                                                                                                                                                                                                                                                                                                                                                                                   |
| <i>R<sub>int</sub></i>                                                                                         | 0.077                                                                                                                                                                                                                                                                                                                                                                                                |
| (sin θ/λ) <sub>max</sub> (Å <sup>-1</sup> )                                                                    | 0.633                                                                                                                                                                                                                                                                                                                                                                                                |
| Refinement                                                                                                     |                                                                                                                                                                                                                                                                                                                                                                                                      |
| <i>R</i> [ <i>F</i> <sup>2</sup> > 2σ( <i>F</i> <sup>2</sup> )], <i>wR</i> ( <i>F</i> <sup>2</sup> ), <i>S</i> | 0.040, 0.064, 1.03                                                                                                                                                                                                                                                                                                                                                                                   |
| No. of reflections                                                                                             | 10030                                                                                                                                                                                                                                                                                                                                                                                                |
| No. of parameters                                                                                              | 582                                                                                                                                                                                                                                                                                                                                                                                                  |
| H-atom treatment                                                                                               | H atoms treated by a mixture of independent and constrained refinement                                                                                                                                                                                                                                                                                                                               |
| Δ <sub>max</sub> , Δ <sub>min</sub> (e Å <sup>-3</sup> )                                                       | 1.20, -0.77                                                                                                                                                                                                                                                                                                                                                                                          |

|                                    |                                                                                                                                                                                                                                                                                |
|------------------------------------|--------------------------------------------------------------------------------------------------------------------------------------------------------------------------------------------------------------------------------------------------------------------------------|
|                                    | [UO <sub>2</sub> (NaL)K(N(SiMe <sub>3</sub> ) <sub>2</sub> )(py)], 4-Na/K                                                                                                                                                                                                      |
| CCDC Number                        | 2313501                                                                                                                                                                                                                                                                        |
| Crystal data                       |                                                                                                                                                                                                                                                                                |
| Chemical formula                   | C <sub>47</sub> H <sub>70</sub> KN <sub>8</sub> NaO <sub>2</sub> Si <sub>2</sub> U·1.5(C <sub>6</sub> H <sub>14</sub> )                                                                                                                                                        |
| <i>M</i> <sub>r</sub>              | 1264.66                                                                                                                                                                                                                                                                        |
| Crystal system, space group        | Monoclinic, <i>I</i> 2/ <i>a</i>                                                                                                                                                                                                                                               |
| Temperature (K)                    | 100                                                                                                                                                                                                                                                                            |
| <i>a</i> , <i>b</i> , <i>c</i> (Å) | 26.8382 (18), 15.5671 (10), 28.998 (3)                                                                                                                                                                                                                                         |
| β (°)                              | 92.423 (2)                                                                                                                                                                                                                                                                     |
| <i>V</i> (Å <sup>3</sup> )         | 12104.4 (17)                                                                                                                                                                                                                                                                   |
| <i>Z</i>                           | 8                                                                                                                                                                                                                                                                              |
| Radiation type                     | Mo <i>K</i> α                                                                                                                                                                                                                                                                  |
| μ (mm <sup>-1</sup> )              | 2.84                                                                                                                                                                                                                                                                           |
| Crystal size (mm)                  | 0.36 × 0.05 × 0.04                                                                                                                                                                                                                                                             |
| Data collection                    |                                                                                                                                                                                                                                                                                |
| Diffractometer                     | Bruker <i>APEX</i> -II CCD                                                                                                                                                                                                                                                     |
| Absorption correction              | Empirical (using intensity measurements)<br>TWINABS-2012/1 (Bruker,2012) was used for absorption correction.<br>Final HKLF 4 output contains 595361 reflections, <i>R</i> <sub>int</sub> = 0.0925<br>(208722 with <i>I</i> > 3σ( <i>I</i> ), <i>R</i> <sub>int</sub> = 0.0572) |

|                                                                                                                |                                                                         |
|----------------------------------------------------------------------------------------------------------------|-------------------------------------------------------------------------|
| No. of measured, independent and observed [ <i>I</i> > 2σ( <i>I</i> )] reflections                             | 21269, 21269, 16103                                                     |
| <i>R</i> <sub>int</sub>                                                                                        | ?                                                                       |
| (sin θ/λ) <sub>max</sub> (Å <sup>-1</sup> )                                                                    | 0.676                                                                   |
| Refinement                                                                                                     |                                                                         |
| <i>R</i> [ <i>F</i> <sup>2</sup> > 2σ( <i>F</i> <sup>2</sup> )], <i>wR</i> ( <i>F</i> <sup>2</sup> ), <i>S</i> | 0.052, 0.106, 1.10                                                      |
| No. of reflections                                                                                             | 21269                                                                   |
| No. of parameters                                                                                              | 741                                                                     |
| No. of restraints                                                                                              | 246                                                                     |
| H-atom treatment                                                                                               | H atoms treated by a mixture of independent and constrained refinement  |
|                                                                                                                | $w = 1/[\sigma^2(F_o^2) + 129.8202P]$<br>where $P = (F_o^2 + 2F_c^2)/3$ |
| Δ <sub>max</sub> , Δ <sub>min</sub> (e Å <sup>-3</sup> )                                                       | 1.23, -1.24                                                             |

|                                                                            |                                                                                                                                                                                                                                                                                                                                                                                                      |
|----------------------------------------------------------------------------|------------------------------------------------------------------------------------------------------------------------------------------------------------------------------------------------------------------------------------------------------------------------------------------------------------------------------------------------------------------------------------------------------|
|                                                                            | [UO <sub>2</sub> (K <sub>2</sub> L)(py) <sub>4</sub> ] <sub>2</sub> , 5-K                                                                                                                                                                                                                                                                                                                            |
| CCDC Number                                                                | 2313502                                                                                                                                                                                                                                                                                                                                                                                              |
| Crystal data                                                               |                                                                                                                                                                                                                                                                                                                                                                                                      |
| Chemical formula                                                           | C <sub>112.003</sub> H <sub>136.003</sub> K <sub>4</sub> N <sub>20.001</sub> O <sub>4</sub> U <sub>2</sub>                                                                                                                                                                                                                                                                                           |
| $M_r$                                                                      | 2458.86                                                                                                                                                                                                                                                                                                                                                                                              |
| Crystal system, space group                                                | Triclinic, $P\bar{1}$                                                                                                                                                                                                                                                                                                                                                                                |
| Temperature (K)                                                            | 120                                                                                                                                                                                                                                                                                                                                                                                                  |
| $a, b, c$ (Å)                                                              | 12.5339 (3), 12.5763 (2), 19.5151 (5)                                                                                                                                                                                                                                                                                                                                                                |
| $\alpha, \beta, \gamma$ (°)                                                | 76.777 (2), 79.539 (2), 68.993 (2)                                                                                                                                                                                                                                                                                                                                                                   |
| $V$ (Å <sup>3</sup> )                                                      | 2778.75 (12)                                                                                                                                                                                                                                                                                                                                                                                         |
| $Z$                                                                        | 1                                                                                                                                                                                                                                                                                                                                                                                                    |
| Radiation type                                                             | Mo $K\alpha$                                                                                                                                                                                                                                                                                                                                                                                         |
| $\mu$ (mm <sup>-1</sup> )                                                  | 3.12                                                                                                                                                                                                                                                                                                                                                                                                 |
| Crystal size (mm)                                                          | 0.62 × 0.47 × 0.24                                                                                                                                                                                                                                                                                                                                                                                   |
| Data collection                                                            |                                                                                                                                                                                                                                                                                                                                                                                                      |
| Diffractometer                                                             | Xcalibur, Eos                                                                                                                                                                                                                                                                                                                                                                                        |
| Absorption correction                                                      | Analytical<br><i>CrysAlis PRO</i> 1.171.42.49 (Rigaku Oxford Diffraction, 2022) Analytical numeric absorption correction using a multifaceted crystal model based on expressions derived by R.C. Clark & J.S. Reid. (Clark, R. C. & Reid, J. S. (1995). <i>Acta Cryst.</i> A51, 887-897) Empirical absorption correction using spherical harmonics, implemented in SCALE3 ABSPACK scaling algorithm. |
| $T_{\min}, T_{\max}$                                                       | 0.069, 0.274                                                                                                                                                                                                                                                                                                                                                                                         |
| No. of measured, independent and observed [ $I > 2\sigma(I)$ ] reflections | 51201, 13766, 12167                                                                                                                                                                                                                                                                                                                                                                                  |
| $R_{\text{int}}$                                                           | 0.051                                                                                                                                                                                                                                                                                                                                                                                                |
| $(\sin \theta/\lambda)_{\text{max}}$ (Å <sup>-1</sup> )                    | 0.698                                                                                                                                                                                                                                                                                                                                                                                                |
| Refinement                                                                 |                                                                                                                                                                                                                                                                                                                                                                                                      |
| $R[F^2 > 2\sigma(F^2)], wR(F^2), S$                                        | 0.033, 0.074, 1.05                                                                                                                                                                                                                                                                                                                                                                                   |
| No. of reflections                                                         | 13766                                                                                                                                                                                                                                                                                                                                                                                                |
| No. of parameters                                                          | 752                                                                                                                                                                                                                                                                                                                                                                                                  |
| No. of restraints                                                          | 301                                                                                                                                                                                                                                                                                                                                                                                                  |
| H-atom treatment                                                           | H-atom parameters constrained                                                                                                                                                                                                                                                                                                                                                                        |
| $\Delta_{\text{max}}, \Delta_{\text{min}}$ (e Å <sup>-3</sup> )            | 2.42, -1.12                                                                                                                                                                                                                                                                                                                                                                                          |

|                                                                                                                   |                                                                                                                                                                                                                                                          |
|-------------------------------------------------------------------------------------------------------------------|----------------------------------------------------------------------------------------------------------------------------------------------------------------------------------------------------------------------------------------------------------|
|                                                                                                                   | [UO <sub>2</sub> (ZnL)(py) <sub>1.5</sub> ] <sub>2</sub> , 6-Zn                                                                                                                                                                                          |
| CCDC Number                                                                                                       | 2313503                                                                                                                                                                                                                                                  |
| Crystal data                                                                                                      |                                                                                                                                                                                                                                                          |
| Chemical formula                                                                                                  | C <sub>87</sub> H <sub>109</sub> N <sub>15</sub> O <sub>4</sub> U <sub>2</sub> Zn <sub>2</sub>                                                                                                                                                           |
| <i>M<sub>r</sub></i>                                                                                              | 2035.69                                                                                                                                                                                                                                                  |
| Crystal system, space group                                                                                       | Monoclinic, <i>P</i> 2 <sub>1</sub> / <i>n</i>                                                                                                                                                                                                           |
| Temperature (K)                                                                                                   | 100                                                                                                                                                                                                                                                      |
| <i>a</i> , <i>b</i> , <i>c</i> (Å)                                                                                | 14.3634 (6), 18.9972 (7), 15.4266 (6)                                                                                                                                                                                                                    |
| β (°)                                                                                                             | 100.975 (2)                                                                                                                                                                                                                                              |
| <i>V</i> (Å <sup>3</sup> )                                                                                        | 4132.4 (3)                                                                                                                                                                                                                                               |
| <i>Z</i>                                                                                                          | 2                                                                                                                                                                                                                                                        |
| Radiation type                                                                                                    | Mo <i>K</i> α                                                                                                                                                                                                                                            |
| μ (mm <sup>-1</sup> )                                                                                             | 4.54                                                                                                                                                                                                                                                     |
| Crystal size (mm)                                                                                                 | 0.23 × 0.21 × 0.05                                                                                                                                                                                                                                       |
| Data collection                                                                                                   |                                                                                                                                                                                                                                                          |
| Diffractometer                                                                                                    | Bruker <i>APEX</i> -II CCD                                                                                                                                                                                                                               |
| Absorption correction                                                                                             | Multi-scan<br><i>SADABS</i> 2016/2 (Bruker,2016/2) was used for absorption correction. <i>wR</i> 2(int) was 0.0886 before and 0.0493 after correction. The Ratio of minimum to maximum transmission is 0.7390. The λ/2 correction factor is Not present. |
| <i>T<sub>min</sub></i> , <i>T<sub>max</sub></i>                                                                   | 0.552, 0.746                                                                                                                                                                                                                                             |
| No. of measured, independent and observed [ <i>I</i> > 2σ( <i>I</i> )] reflections                                | 196713, 15026, 12811                                                                                                                                                                                                                                     |
| <i>R</i> <sub>int</sub>                                                                                           | 0.044                                                                                                                                                                                                                                                    |
| (sin θ/λ) <sub>max</sub> (Å <sup>-1</sup> )                                                                       | 0.758                                                                                                                                                                                                                                                    |
| Refinement                                                                                                        |                                                                                                                                                                                                                                                          |
| <i>R</i> [ <i>F</i> <sup>2</sup> > 2σ( <i>F</i> <sup>2</sup> )],<br><i>wR</i> ( <i>F</i> <sup>2</sup> ), <i>S</i> | 0.023, 0.051, 1.03                                                                                                                                                                                                                                       |
| No. of reflections                                                                                                | 15026                                                                                                                                                                                                                                                    |
| No. of parameters                                                                                                 | 611                                                                                                                                                                                                                                                      |
| H-atom treatment                                                                                                  | H-atom parameters constrained                                                                                                                                                                                                                            |
| Δ <sub>max</sub> , Δ <sub>min</sub> (e Å <sup>-3</sup> )                                                          | 1.93, -2.16                                                                                                                                                                                                                                              |

|                                                                                                                |                                                                                                                                                                                                                                                                                     |
|----------------------------------------------------------------------------------------------------------------|-------------------------------------------------------------------------------------------------------------------------------------------------------------------------------------------------------------------------------------------------------------------------------------|
|                                                                                                                | [UO <sub>2</sub> (YL)(Cl)(py) <sub>2</sub> ] <sub>2</sub> , 6-Y                                                                                                                                                                                                                     |
| CCDC Number                                                                                                    | 2313504                                                                                                                                                                                                                                                                             |
| Crystal data                                                                                                   |                                                                                                                                                                                                                                                                                     |
| Chemical formula                                                                                               | C <sub>92</sub> H <sub>114</sub> Cl <sub>2</sub> N <sub>16</sub> O <sub>4</sub> U <sub>2</sub> Y <sub>2</sub>                                                                                                                                                                       |
| <i>M</i> <sub>r</sub>                                                                                          | 2232.77                                                                                                                                                                                                                                                                             |
| Crystal system, space group                                                                                    | Monoclinic, <i>P</i> 2 <sub>1</sub> / <i>n</i>                                                                                                                                                                                                                                      |
| Temperature (K)                                                                                                | 100                                                                                                                                                                                                                                                                                 |
| <i>a</i> , <i>b</i> , <i>c</i> (Å)                                                                             | 17.5026 (9), 17.0392 (9), 17.5819 (9)                                                                                                                                                                                                                                               |
| β (°)                                                                                                          | 104.439 (2)                                                                                                                                                                                                                                                                         |
| <i>V</i> (Å <sup>3</sup> )                                                                                     | 5077.8 (5)                                                                                                                                                                                                                                                                          |
| <i>Z</i>                                                                                                       | 2                                                                                                                                                                                                                                                                                   |
| Radiation type                                                                                                 | Mo <i>K</i> α                                                                                                                                                                                                                                                                       |
| μ (mm <sup>-1</sup> )                                                                                          | 4.42                                                                                                                                                                                                                                                                                |
| Crystal size (mm)                                                                                              | 0.06 × 0.05 × 0.02                                                                                                                                                                                                                                                                  |
| Data collection                                                                                                |                                                                                                                                                                                                                                                                                     |
| Diffractometer                                                                                                 | Bruker <i>APEX</i> -II CCD                                                                                                                                                                                                                                                          |
| Absorption correction                                                                                          | Empirical (using intensity measurements) <i>SADABS</i> 2016/2 (Bruker,2016/2) was used for absorption correction. <i>wR</i> 2(int) was 0.0803 before and 0.0702 after correction. The Ratio of minimum to maximum transmission is 0.9251. The λ/2 correction factor is Not present. |
| <i>T</i> <sub>min</sub> , <i>T</i> <sub>max</sub>                                                              | 0.690, 0.745                                                                                                                                                                                                                                                                        |
| No. of measured, independent and observed [ <i>I</i> > 2σ( <i>I</i> )] reflections                             | 176971, 10409, 8731                                                                                                                                                                                                                                                                 |
| <i>R</i> <sub>int</sub>                                                                                        | 0.089                                                                                                                                                                                                                                                                               |
| (sin θ/λ) <sub>max</sub> (Å <sup>-1</sup> )                                                                    | 0.626                                                                                                                                                                                                                                                                               |
| Refinement                                                                                                     |                                                                                                                                                                                                                                                                                     |
| <i>R</i> [ <i>F</i> <sup>2</sup> > 2σ( <i>F</i> <sup>2</sup> )], <i>wR</i> ( <i>F</i> <sup>2</sup> ), <i>S</i> | 0.030, 0.067, 1.07                                                                                                                                                                                                                                                                  |
| No. of reflections                                                                                             | 10409                                                                                                                                                                                                                                                                               |
| No. of parameters                                                                                              | 533                                                                                                                                                                                                                                                                                 |
| H-atom treatment                                                                                               | H-atom parameters constrained                                                                                                                                                                                                                                                       |
|                                                                                                                | $w = 1/[\sigma^2(F_o^2) + (0.019P)^2 + 17.603P]$<br>where $P = (F_o^2 + 2F_c^2)/3$                                                                                                                                                                                                  |
| Δ <sub>max</sub> , Δ <sub>min</sub> (e Å <sup>-3</sup> )                                                       | 1.06, -0.96                                                                                                                                                                                                                                                                         |



|                                                                            |                                                                                                                                                                                                                                                                                                                                                                                                      |
|----------------------------------------------------------------------------|------------------------------------------------------------------------------------------------------------------------------------------------------------------------------------------------------------------------------------------------------------------------------------------------------------------------------------------------------------------------------------------------------|
|                                                                            | [UO <sub>2</sub> (SmL)(Cl)(py) <sub>2</sub> ] <sub>2</sub> , 6-Sm                                                                                                                                                                                                                                                                                                                                    |
| CCDC Number                                                                | 2313505                                                                                                                                                                                                                                                                                                                                                                                              |
| Crystal data                                                               |                                                                                                                                                                                                                                                                                                                                                                                                      |
| Chemical formula                                                           | C <sub>92</sub> H <sub>114</sub> Cl <sub>2</sub> N <sub>16</sub> O <sub>4</sub> Sm <sub>2</sub> U <sub>2</sub>                                                                                                                                                                                                                                                                                       |
| $M_r$                                                                      | 2355.65                                                                                                                                                                                                                                                                                                                                                                                              |
| Crystal system, space group                                                | Monoclinic, $P2_1/n$                                                                                                                                                                                                                                                                                                                                                                                 |
| Temperature (K)                                                            | 120                                                                                                                                                                                                                                                                                                                                                                                                  |
| $a, b, c$ (Å)                                                              | 17.5417 (2), 17.1342 (2), 17.6710 (2)                                                                                                                                                                                                                                                                                                                                                                |
| $\beta$ (°)                                                                | 104.591 (1)                                                                                                                                                                                                                                                                                                                                                                                          |
| $V$ (Å <sup>3</sup> )                                                      | 5139.95 (10)                                                                                                                                                                                                                                                                                                                                                                                         |
| $Z$                                                                        | 2                                                                                                                                                                                                                                                                                                                                                                                                    |
| Radiation type                                                             | Mo $K\alpha$                                                                                                                                                                                                                                                                                                                                                                                         |
| $\mu$ (mm <sup>-1</sup> )                                                  | 4.37                                                                                                                                                                                                                                                                                                                                                                                                 |
| Crystal size (mm)                                                          | 0.26 × 0.13 × 0.04                                                                                                                                                                                                                                                                                                                                                                                   |
| Data collection                                                            |                                                                                                                                                                                                                                                                                                                                                                                                      |
| Diffractometer                                                             | Xcalibur, Eos                                                                                                                                                                                                                                                                                                                                                                                        |
| Absorption correction                                                      | Analytical<br><i>CrysAlis PRO</i> 1.171.42.49 (Rigaku Oxford Diffraction, 2022) Analytical numeric absorption correction using a multifaceted crystal model based on expressions derived by R.C. Clark & J.S. Reid. (Clark, R. C. & Reid, J. S. (1995). <i>Acta Cryst.</i> A51, 887-897) Empirical absorption correction using spherical harmonics, implemented in SCALE3 ABSPACK scaling algorithm. |
| $T_{\min}, T_{\max}$                                                       | 0.363, 0.756                                                                                                                                                                                                                                                                                                                                                                                         |
| No. of measured, independent and observed [ $I > 2\sigma(I)$ ] reflections | 133748, 13125, 11074                                                                                                                                                                                                                                                                                                                                                                                 |
| $R_{\text{int}}$                                                           | 0.053                                                                                                                                                                                                                                                                                                                                                                                                |
| $(\sin \theta/\lambda)_{\text{max}}$ (Å <sup>-1</sup> )                    | 0.692                                                                                                                                                                                                                                                                                                                                                                                                |
| Refinement                                                                 |                                                                                                                                                                                                                                                                                                                                                                                                      |
| $R[F^2 > 2\sigma(F^2)], wR(F^2), S$                                        | 0.027, 0.056, 1.03                                                                                                                                                                                                                                                                                                                                                                                   |
| No. of reflections                                                         | 13125                                                                                                                                                                                                                                                                                                                                                                                                |
| No. of parameters                                                          | 533                                                                                                                                                                                                                                                                                                                                                                                                  |
| H-atom treatment                                                           | H-atom parameters constrained                                                                                                                                                                                                                                                                                                                                                                        |
| $\Delta_{\text{max}}, \Delta_{\text{min}}$ (e Å <sup>-3</sup> )            | 2.04, -0.73                                                                                                                                                                                                                                                                                                                                                                                          |

|                                                                                                                   |                                                                                                                                                                                              |
|-------------------------------------------------------------------------------------------------------------------|----------------------------------------------------------------------------------------------------------------------------------------------------------------------------------------------|
|                                                                                                                   | [UO <sub>2</sub> (DyL)(Cl)(py) <sub>2</sub> ] <sub>2</sub> , 6-Dy                                                                                                                            |
| CCDC Number                                                                                                       | 2313506                                                                                                                                                                                      |
| Crystal data                                                                                                      |                                                                                                                                                                                              |
| Chemical formula                                                                                                  | C <sub>92</sub> H <sub>114</sub> Cl <sub>2</sub> Dy <sub>2</sub> N <sub>16</sub> O <sub>4</sub> U <sub>2</sub> ·3(C <sub>5</sub> H <sub>5</sub> N)                                           |
| <i>M</i> <sub>r</sub>                                                                                             | 2617.24                                                                                                                                                                                      |
| Crystal system, space group                                                                                       | Monoclinic, <i>P</i> 2 <sub>1</sub> / <i>n</i>                                                                                                                                               |
| Temperature (K)                                                                                                   | 120                                                                                                                                                                                          |
| <i>a</i> , <i>b</i> , <i>c</i> (Å)                                                                                | 17.5882 (7), 17.0832 (4), 17.6031 (5)                                                                                                                                                        |
| β (°)                                                                                                             | 104.739 (4)                                                                                                                                                                                  |
| <i>V</i> (Å <sup>3</sup> )                                                                                        | 5115.0 (3)                                                                                                                                                                                   |
| <i>Z</i>                                                                                                          | 2                                                                                                                                                                                            |
| Radiation type                                                                                                    | Mo <i>K</i> α                                                                                                                                                                                |
| μ (mm <sup>-1</sup> )                                                                                             | 4.71                                                                                                                                                                                         |
| Crystal size (mm)                                                                                                 | 0.46 × 0.26 × 0.24                                                                                                                                                                           |
| Data collection                                                                                                   |                                                                                                                                                                                              |
| Diffractometer                                                                                                    | Xcalibur, Eos                                                                                                                                                                                |
| Absorption correction                                                                                             | Multi-scan<br><i>CrysAlis PRO</i> 1.171.42.81a (Rigaku Oxford Diffraction, 2023) Empirical absorption correction using spherical harmonics, implemented in SCALE3 ABSPACK scaling algorithm. |
| <i>T</i> <sub>min</sub> , <i>T</i> <sub>max</sub>                                                                 | 0.755, 1.000                                                                                                                                                                                 |
| No. of measured, independent and observed [ <i>I</i> > 2σ( <i>I</i> )] reflections                                | 28997, 9868, 7702                                                                                                                                                                            |
| <i>R</i> <sub>int</sub>                                                                                           | 0.046                                                                                                                                                                                        |
| (sin θ/λ) <sub>max</sub> (Å <sup>-1</sup> )                                                                       | 0.625                                                                                                                                                                                        |
| Refinement                                                                                                        |                                                                                                                                                                                              |
| <i>R</i> [ <i>F</i> <sup>2</sup> > 2σ( <i>F</i> <sup>2</sup> )],<br><i>wR</i> ( <i>F</i> <sup>2</sup> ), <i>S</i> | 0.051, 0.136, 1.13                                                                                                                                                                           |
| No. of reflections                                                                                                | 9868                                                                                                                                                                                         |
| No. of parameters                                                                                                 | 641                                                                                                                                                                                          |
| No. of restraints                                                                                                 | 200                                                                                                                                                                                          |
| H-atom treatment                                                                                                  | H-atom parameters constrained                                                                                                                                                                |
|                                                                                                                   | $w = 1/[\sigma^2(F_o^2) + (0.0419P)^2 + 66.7969P]$<br>where $P = (F_o^2 + 2F_c^2)/3$                                                                                                         |
| Δ <sub>max</sub> , Δ <sub>min</sub> (e Å <sup>-3</sup> )                                                          | 3.02, -2.34                                                                                                                                                                                  |

|                                                                                                                |                                                                                                                                                                                                                                                                                                                                                                                                      |
|----------------------------------------------------------------------------------------------------------------|------------------------------------------------------------------------------------------------------------------------------------------------------------------------------------------------------------------------------------------------------------------------------------------------------------------------------------------------------------------------------------------------------|
|                                                                                                                | [UO <sub>2</sub> (YL)(Cl)(LiCl) <sub>2</sub> ], 6-Y'                                                                                                                                                                                                                                                                                                                                                 |
| CCDC Number                                                                                                    | 2313507                                                                                                                                                                                                                                                                                                                                                                                              |
| Crystal data                                                                                                   |                                                                                                                                                                                                                                                                                                                                                                                                      |
| Chemical formula                                                                                               | C <sub>66</sub> H <sub>77</sub> Cl <sub>3</sub> Li <sub>2</sub> N <sub>12</sub> O <sub>2</sub> UY·C <sub>5</sub> H <sub>5</sub> N                                                                                                                                                                                                                                                                    |
| <i>M</i> <sub>r</sub>                                                                                          | 1596.66                                                                                                                                                                                                                                                                                                                                                                                              |
| Crystal system, space group                                                                                    | Monoclinic, <i>P</i> 2 <sub>1</sub> / <i>n</i>                                                                                                                                                                                                                                                                                                                                                       |
| Temperature (K)                                                                                                | 120                                                                                                                                                                                                                                                                                                                                                                                                  |
| <i>a</i> , <i>b</i> , <i>c</i> (Å)                                                                             | 19.0604 (3), 17.0605 (2), 24.4496 (4)                                                                                                                                                                                                                                                                                                                                                                |
| β (°)                                                                                                          | 106.506 (2)                                                                                                                                                                                                                                                                                                                                                                                          |
| <i>V</i> (Å <sup>3</sup> )                                                                                     | 7622.9 (2)                                                                                                                                                                                                                                                                                                                                                                                           |
| <i>Z</i>                                                                                                       | 4                                                                                                                                                                                                                                                                                                                                                                                                    |
| Radiation type                                                                                                 | Mo <i>K</i> α                                                                                                                                                                                                                                                                                                                                                                                        |
| μ (mm <sup>-1</sup> )                                                                                          | 3.03                                                                                                                                                                                                                                                                                                                                                                                                 |
| Crystal size (mm)                                                                                              | 0.39 × 0.38 × 0.09                                                                                                                                                                                                                                                                                                                                                                                   |
| Data collection                                                                                                |                                                                                                                                                                                                                                                                                                                                                                                                      |
| Diffractometer                                                                                                 | Xcalibur, Eos                                                                                                                                                                                                                                                                                                                                                                                        |
| Absorption correction                                                                                          | Analytical<br><i>CrysAlis PRO</i> 1.171.42.49 (Rigaku Oxford Diffraction, 2022) Analytical numeric absorption correction using a multifaceted crystal model based on expressions derived by R.C. Clark & J.S. Reid. (Clark, R. C. & Reid, J. S. (1995). <i>Acta Cryst.</i> A51, 887-897) Empirical absorption correction using spherical harmonics, implemented in SCALE3 ABSPACK scaling algorithm. |
| <i>T</i> <sub>min</sub> , <i>T</i> <sub>max</sub>                                                              | 0.203, 0.653                                                                                                                                                                                                                                                                                                                                                                                         |
| No. of measured, independent and observed [ <i>I</i> > 2σ( <i>I</i> )] reflections                             | 153359, 18097, 13924                                                                                                                                                                                                                                                                                                                                                                                 |
| <i>R</i> <sub>int</sub>                                                                                        | 0.071                                                                                                                                                                                                                                                                                                                                                                                                |
| (sin θ/λ) <sub>max</sub> (Å <sup>-1</sup> )                                                                    | 0.679                                                                                                                                                                                                                                                                                                                                                                                                |
| Refinement                                                                                                     |                                                                                                                                                                                                                                                                                                                                                                                                      |
| <i>R</i> [ <i>F</i> <sup>2</sup> > 2σ( <i>F</i> <sup>2</sup> )], <i>wR</i> ( <i>F</i> <sup>2</sup> ), <i>S</i> | 0.036, 0.072, 1.02                                                                                                                                                                                                                                                                                                                                                                                   |
| No. of reflections                                                                                             | 18097                                                                                                                                                                                                                                                                                                                                                                                                |
| No. of parameters                                                                                              | 839                                                                                                                                                                                                                                                                                                                                                                                                  |
| H-atom treatment                                                                                               | H-atom parameters constrained                                                                                                                                                                                                                                                                                                                                                                        |
|                                                                                                                | $w = 1/[\sigma^2(F_o^2) + (0.0254P)^2 + 10.9349P]$<br>where $P = (F_o^2 + 2F_c^2)/3$                                                                                                                                                                                                                                                                                                                 |
| Δ <sub>max</sub> , Δ <sub>min</sub> (e Å <sup>-3</sup> )                                                       | 1.19, -1.18                                                                                                                                                                                                                                                                                                                                                                                          |

|                                                                                                                |                                                                                                                                                                                                                                                                                                                                                                                                      |
|----------------------------------------------------------------------------------------------------------------|------------------------------------------------------------------------------------------------------------------------------------------------------------------------------------------------------------------------------------------------------------------------------------------------------------------------------------------------------------------------------------------------------|
|                                                                                                                | [UO <sub>2</sub> (DyL)(Cl)(LiCl) <sub>2</sub> ], 6-Dy'                                                                                                                                                                                                                                                                                                                                               |
| CCDC Number                                                                                                    | 2313508                                                                                                                                                                                                                                                                                                                                                                                              |
| Crystal data                                                                                                   |                                                                                                                                                                                                                                                                                                                                                                                                      |
| Chemical formula                                                                                               | C <sub>66</sub> H <sub>77</sub> Cl <sub>3</sub> DyLi <sub>2</sub> N <sub>12</sub> O <sub>2</sub> U·2(C <sub>3</sub> H <sub>5</sub> N)                                                                                                                                                                                                                                                                |
| <i>M<sub>r</sub></i>                                                                                           | 1749.35                                                                                                                                                                                                                                                                                                                                                                                              |
| Crystal system, space group                                                                                    | Monoclinic, <i>P2<sub>1</sub>/n</i>                                                                                                                                                                                                                                                                                                                                                                  |
| Temperature (K)                                                                                                | 120                                                                                                                                                                                                                                                                                                                                                                                                  |
| <i>a</i> , <i>b</i> , <i>c</i> (Å)                                                                             | 19.0653 (4), 17.0891 (3), 24.4481 (5)                                                                                                                                                                                                                                                                                                                                                                |
| β (°)                                                                                                          | 106.566 (2)                                                                                                                                                                                                                                                                                                                                                                                          |
| <i>V</i> (Å <sup>3</sup> )                                                                                     | 7634.8 (3)                                                                                                                                                                                                                                                                                                                                                                                           |
| <i>Z</i>                                                                                                       | 4                                                                                                                                                                                                                                                                                                                                                                                                    |
| Radiation type                                                                                                 | Mo <i>K</i> α                                                                                                                                                                                                                                                                                                                                                                                        |
| μ (mm <sup>-1</sup> )                                                                                          | 3.25                                                                                                                                                                                                                                                                                                                                                                                                 |
| Crystal size (mm)                                                                                              | 0.46 × 0.24 × 0.06                                                                                                                                                                                                                                                                                                                                                                                   |
| Data collection                                                                                                |                                                                                                                                                                                                                                                                                                                                                                                                      |
| Diffractometer                                                                                                 | Xcalibur, Eos                                                                                                                                                                                                                                                                                                                                                                                        |
| Absorption correction                                                                                          | Analytical<br><i>CrysAlis PRO</i> 1.171.42.49 (Rigaku Oxford Diffraction, 2022) Analytical numeric absorption correction using a multifaceted crystal model based on expressions derived by R.C. Clark & J.S. Reid. (Clark, R. C. & Reid, J. S. (1995). <i>Acta Cryst.</i> A51, 887-897) Empirical absorption correction using spherical harmonics, implemented in SCALE3 ABSPACK scaling algorithm. |
| <i>T<sub>min</sub></i> , <i>T<sub>max</sub></i>                                                                | 0.224, 0.752                                                                                                                                                                                                                                                                                                                                                                                         |
| No. of measured, independent and observed [ <i>I</i> > 2σ( <i>I</i> )] reflections                             | 79648, 17518, 13292                                                                                                                                                                                                                                                                                                                                                                                  |
| <i>R<sub>int</sub></i>                                                                                         | 0.067                                                                                                                                                                                                                                                                                                                                                                                                |
| (sin θ/λ) <sub>max</sub> (Å <sup>-1</sup> )                                                                    | 0.680                                                                                                                                                                                                                                                                                                                                                                                                |
| Refinement                                                                                                     |                                                                                                                                                                                                                                                                                                                                                                                                      |
| <i>R</i> [ <i>F</i> <sup>2</sup> > 2σ( <i>F</i> <sup>2</sup> )], <i>wR</i> ( <i>F</i> <sup>2</sup> ), <i>S</i> | 0.042, 0.079, 1.04                                                                                                                                                                                                                                                                                                                                                                                   |
| No. of reflections                                                                                             | 17518                                                                                                                                                                                                                                                                                                                                                                                                |
| No. of parameters                                                                                              | 893                                                                                                                                                                                                                                                                                                                                                                                                  |
| No. of restraints                                                                                              | 100                                                                                                                                                                                                                                                                                                                                                                                                  |
| H-atom treatment                                                                                               | H-atom parameters constrained                                                                                                                                                                                                                                                                                                                                                                        |
|                                                                                                                | $w = 1/[\sigma^2(F_o^2) + (0.0231P)^2 + 10.4983P]$<br>where $P = (F_o^2 + 2F_c^2)/3$                                                                                                                                                                                                                                                                                                                 |
| Δ <sub>max</sub> , Δ <sub>min</sub> (e Å <sup>-3</sup> )                                                       | 1.36, -1.26                                                                                                                                                                                                                                                                                                                                                                                          |

|                                                                                                                |                                                                                                                                                                                                                                                                                   |
|----------------------------------------------------------------------------------------------------------------|-----------------------------------------------------------------------------------------------------------------------------------------------------------------------------------------------------------------------------------------------------------------------------------|
|                                                                                                                | [UO <sub>2</sub> (YL)(THF) <sub>2</sub> ] <sub>2</sub> , 7-THF                                                                                                                                                                                                                    |
| CCDC Number                                                                                                    | 2313509                                                                                                                                                                                                                                                                           |
| Crystal data                                                                                                   |                                                                                                                                                                                                                                                                                   |
| Chemical formula                                                                                               | C <sub>80</sub> H <sub>110</sub> N <sub>12</sub> O <sub>6</sub> U <sub>2</sub> Y <sub>2</sub>                                                                                                                                                                                     |
| <i>M</i> <sub>r</sub>                                                                                          | 1989.67                                                                                                                                                                                                                                                                           |
| Crystal system, space group                                                                                    | Triclinic, <i>P</i> <sup>-</sup> 1                                                                                                                                                                                                                                                |
| Temperature (K)                                                                                                | 120                                                                                                                                                                                                                                                                               |
| <i>a</i> , <i>b</i> , <i>c</i> (Å)                                                                             | 15.3299 (4), 16.2642 (4), 21.1749 (4)                                                                                                                                                                                                                                             |
| α, β, γ (°)                                                                                                    | 74.514 (2), 87.911 (2), 82.799 (2)                                                                                                                                                                                                                                                |
| <i>V</i> (Å <sup>3</sup> )                                                                                     | 5047.7 (2)                                                                                                                                                                                                                                                                        |
| <i>Z</i>                                                                                                       | 2                                                                                                                                                                                                                                                                                 |
| Radiation type                                                                                                 | Cu <i>K</i> α                                                                                                                                                                                                                                                                     |
| μ (mm <sup>-1</sup> )                                                                                          | 10.77                                                                                                                                                                                                                                                                             |
| Crystal size (mm)                                                                                              | 0.36 × 0.09 × 0.06                                                                                                                                                                                                                                                                |
| Data collection                                                                                                |                                                                                                                                                                                                                                                                                   |
| Diffractometer                                                                                                 | SuperNova, Dual, Cu at home/near, Atlas                                                                                                                                                                                                                                           |
| Absorption correction                                                                                          | Empirical (using intensity measurements) <i>SADABS2016/2</i> (Bruker,2016/2) was used for absorption correction. <i>wR2(int)</i> was 0.1210 before and 0.0749 after correction. The Ratio of minimum to maximum transmission is 0.1867. The λ/2 correction factor is Not present. |
| <i>T</i> <sub>min</sub> , <i>T</i> <sub>max</sub>                                                              | 0.110, 0.588                                                                                                                                                                                                                                                                      |
| No. of measured, independent and observed [ <i>I</i> > 2σ( <i>I</i> )] reflections                             | 107929, 20831, 16990                                                                                                                                                                                                                                                              |
| <i>R</i> <sub>int</sub>                                                                                        | 0.074                                                                                                                                                                                                                                                                             |
| (sin θ/λ) <sub>max</sub> (Å <sup>-1</sup> )                                                                    | 0.629                                                                                                                                                                                                                                                                             |
| Refinement                                                                                                     |                                                                                                                                                                                                                                                                                   |
| <i>R</i> [ <i>F</i> <sup>2</sup> > 2σ( <i>F</i> <sup>2</sup> )], <i>wR</i> ( <i>F</i> <sup>2</sup> ), <i>S</i> | 0.058, 0.146, 1.07                                                                                                                                                                                                                                                                |
| No. of reflections                                                                                             | 20831                                                                                                                                                                                                                                                                             |
| No. of parameters                                                                                              | 949                                                                                                                                                                                                                                                                               |
| H-atom treatment                                                                                               | H-atom parameters constrained                                                                                                                                                                                                                                                     |
|                                                                                                                | $w = 1/[\sigma^2(F_o^2) + (0.0372P)^2 + 69.4686P]$<br>where $P = (F_o^2 + 2F_c^2)/3$                                                                                                                                                                                              |
| Δ <sub>max</sub> , Δ <sub>min</sub> (e Å <sup>-3</sup> )                                                       | 4.56, -5.13                                                                                                                                                                                                                                                                       |

|                                                                                                                |                                                                                                                                                                                                                                                                                                                                                                                                      |
|----------------------------------------------------------------------------------------------------------------|------------------------------------------------------------------------------------------------------------------------------------------------------------------------------------------------------------------------------------------------------------------------------------------------------------------------------------------------------------------------------------------------------|
|                                                                                                                | [UO <sub>2</sub> (YL)(py) <sub>2</sub> ] <sub>2</sub> (py), 7-Py                                                                                                                                                                                                                                                                                                                                     |
| CCDC Number                                                                                                    | 2313510                                                                                                                                                                                                                                                                                                                                                                                              |
| Crystal data                                                                                                   |                                                                                                                                                                                                                                                                                                                                                                                                      |
| Chemical formula                                                                                               | C <sub>87</sub> H <sub>109</sub> N <sub>15</sub> O <sub>4</sub> U <sub>2</sub> Y <sub>2</sub> ·C <sub>6</sub> H <sub>14</sub> ·[+solvents]                                                                                                                                                                                                                                                           |
| <i>M</i> <sub>r</sub>                                                                                          | 2168.94                                                                                                                                                                                                                                                                                                                                                                                              |
| Crystal system, space group                                                                                    | Triclinic, <i>P</i> <sup>-</sup> 1                                                                                                                                                                                                                                                                                                                                                                   |
| Temperature (K)                                                                                                | 120                                                                                                                                                                                                                                                                                                                                                                                                  |
| <i>a</i> , <i>b</i> , <i>c</i> (Å)                                                                             | 12.1503 (3), 16.1749 (4), 24.3853 (7)                                                                                                                                                                                                                                                                                                                                                                |
| α, β, γ (°)                                                                                                    | 79.382 (2), 82.241 (2), 85.201 (2)                                                                                                                                                                                                                                                                                                                                                                   |
| <i>V</i> (Å <sup>3</sup> )                                                                                     | 4658.7 (2)                                                                                                                                                                                                                                                                                                                                                                                           |
| <i>Z</i>                                                                                                       | 2                                                                                                                                                                                                                                                                                                                                                                                                    |
| Radiation type                                                                                                 | Mo <i>K</i> α                                                                                                                                                                                                                                                                                                                                                                                        |
| μ (mm <sup>-1</sup> )                                                                                          | 4.76                                                                                                                                                                                                                                                                                                                                                                                                 |
| Crystal size (mm)                                                                                              | 0.50 × 0.14 × 0.12                                                                                                                                                                                                                                                                                                                                                                                   |
| Data collection                                                                                                |                                                                                                                                                                                                                                                                                                                                                                                                      |
| Diffractometer                                                                                                 | Xcalibur, Eos                                                                                                                                                                                                                                                                                                                                                                                        |
| Absorption correction                                                                                          | Analytical<br><i>CrysAlis PRO</i> 1.171.42.49 (Rigaku Oxford Diffraction, 2022) Analytical numeric absorption correction using a multifaceted crystal model based on expressions derived by R.C. Clark & J.S. Reid. (Clark, R. C. & Reid, J. S. (1995). <i>Acta Cryst.</i> A51, 887-897) Empirical absorption correction using spherical harmonics, implemented in SCALE3 ABSPACK scaling algorithm. |
| <i>T</i> <sub>min</sub> , <i>T</i> <sub>max</sub>                                                              | 0.311, 0.650                                                                                                                                                                                                                                                                                                                                                                                         |
| No. of measured, independent and observed [ <i>I</i> > 2σ( <i>I</i> )] reflections                             | 93776, 19017, 15700                                                                                                                                                                                                                                                                                                                                                                                  |
| <i>R</i> <sub>int</sub>                                                                                        | 0.070                                                                                                                                                                                                                                                                                                                                                                                                |
| (sin θ/λ) <sub>max</sub> (Å <sup>-1</sup> )                                                                    | 0.625                                                                                                                                                                                                                                                                                                                                                                                                |
| Refinement                                                                                                     |                                                                                                                                                                                                                                                                                                                                                                                                      |
| <i>R</i> [ <i>F</i> <sup>2</sup> > 2σ( <i>F</i> <sup>2</sup> )], <i>wR</i> ( <i>F</i> <sup>2</sup> ), <i>S</i> | 0.063, 0.146, 1.11                                                                                                                                                                                                                                                                                                                                                                                   |
| No. of reflections                                                                                             | 19017                                                                                                                                                                                                                                                                                                                                                                                                |
| No. of parameters                                                                                              | 1049                                                                                                                                                                                                                                                                                                                                                                                                 |
| No. of restraints                                                                                              | 1233                                                                                                                                                                                                                                                                                                                                                                                                 |
| H-atom treatment                                                                                               | H-atom parameters constrained                                                                                                                                                                                                                                                                                                                                                                        |
|                                                                                                                | $w = 1/[\sigma^2(F_o^2) + (0.0349P)^2 + 76.4691P]$<br>where $P = (F_o^2 + 2F_c^2)/3$                                                                                                                                                                                                                                                                                                                 |
| Δ <sub>max</sub> , Δ <sub>min</sub> (e Å <sup>-3</sup> )                                                       | 4.14, -2.02                                                                                                                                                                                                                                                                                                                                                                                          |

## References

1. G. Sheldrick, *Acta Cryst. C*, 2015, **71**, 3-8.
2. G. Sheldrick, *Acta Cryst. A*, 2015, **71**, 3-8.
3. O. V. Dolomanov, L. J. Bourhis, R. J. Gildea, J. A. K. Howard and H. Puschmann, *J. Appl. Crystallogr.*, 2009, **42**, 339-341.
4. C. F. Macrae, I. Sovago, S. J. Cottrell, P. T. A. Galek, P. McCabe, E. Pidcock, M. Platings, G. P. Shields, J. S. Stevens, M. Towler and P. A. Wood, *J. Appl. Crystallogr.*, 2020, **53**, 226-235.
5. J. S. Hart, G. S. Nichol and J. B. Love, *Dalton Trans.*, 2012, **41**, 5785-5788.
